# Supplementary material for: Site-specific azide-acetyllysine photochemistry on epigenetic readers for interactome profiling
Source: Royal Society of Chemistry journal article supplement (doi:10.1039/c7sc00284j), 2017-01-01
Supplement: c7sc00284j2.xlsx [file c7sc00284j2.xlsx]

## Sheet: Sheet1
Proteins present in both the biological replicates			UNIQUE PEPTIDE COUNTS			UNIQUE PEPTIDE COUNTS				NORMALIZED TOTAL SPECTRA			NORMALIZED TOTAL SPECTRA			FOLD ENRICHMENT	p-Value
and with averaged unique peptide counts >2	Accession		NO LIGHT			LIGHT				NO LIGHT			LIGHT			(+UV/-UV)
	Number	Mol. Wt.	1st set	2nd set	avg (No light)	1st set	2nd set	Avg (Light)		1st set	2nd set	Avg (No light)	1 st set	2nd set	Avg (Light)
K1C10_HUMAN Keratin, type I cytoskeletal 10	P13645	59 kDa	152	161	156.5	156	141	148.5		383.95	391.086	387.518	346.551	297.222	321.887	0.830636	0.118991
K2C1_HUMAN Keratin, type II cytoskeletal 1	P04264	66 kDa	154	159	156.5	165	136	150.5		418.889	393.298	406.093	334.367	300.043	317.205	0.781113	0.053396
K22E_HUMAN Keratin, type II cytoskeletal 2 epidermal	P35908	65 kDa	159	174	166.5	187	153	170		316.373	308.914	312.644	297.477	260.324	278.9	0.892072	0.216883
K1C9_HUMAN Keratin, type I cytoskeletal 9	P35527	62 kDa	100	95	97.5	103	90	96.5		206.173	187.503	196.838	149.997	150.107	150.052	0.762312	0.0375805
ENOA_HUMAN Alpha-enolase	P06733	47 kDa	48	50	49	61	51	56		88.5684	109.204	98.8863	122.492	111.128	116.81	1.18126	0.267501
G3P_HUMAN Glyceraldehyde-3-phosphate dehydrogenase	P04406	36 kDa	42	50	46	52	51	51.5		151.497	145.448	148.473	156.544	160.261	158.402	1.06688	0.107582
KPYM_HUMAN Pyruvate kinase PKM	P14618	58 kDa	70	66	68	79	78	78.5		121.371	90.7587	106.065	121.764	122.399	122.081	1.15101	0.40528
KCRB_HUMAN Creatine kinase B-type	P12277	43 kDa	40	38	39	47	45	46		86.9652	85.4003	86.1827	91.2215	88.3908	89.8062	1.04204	0.154369
ACTG_HUMAN Actin, cytoplasmic 2	P63261	42 kDa	38	45	41.5	55	45	50		74.9319	80.7677	77.8498	93.4868	84.1407	88.8137	1.14083	0.184856
SAHH_HUMAN Adenosylhomocysteinase	P23526	48 kDa	47	46	46.5	54	48	51		88.3918	63.0997	75.7458	84.1093	92.7053	88.4073	1.16716	0.443203
BRD4_HUMAN Bromodomain-containing protein 4	O60885	152 kDa	22	23	22.5	26	24	25		76.3683	68.3959	72.3821	92.2375	109.772	101.005	1.39544	0.0970191
G6PI_HUMAN Glucose-6-phosphate isomerase	P06744	63 kDa	30	34	32	44	36	40		48.0042	54.0111	51.0076	69.4164	54.6296	62.023	1.21596	0.301514
EF2_HUMAN Elongation factor 2	P13639	95 kDa	37	41	39	56	46	51		57.4932	60.6404	59.0668	83.4	67.7288	75.5644	1.2793	0.175035
UBA1_HUMAN Ubiquitin-like modifier-activating enzyme 1	P22314	118 kDa	37	37	37	44	38	41		73.419	61.924	67.6715	68.0114	60.7326	64.372	0.951243	0.675591
HSP7C_HUMAN Heat shock cognate 71 kDa protein	P11142	71 kDa	31	36	33.5	41	37	39		51.8451	55.5603	53.7027	45.006	52.0389	48.5224	0.903538	0.322522
PUR4_HUMAN Phosphoribosylformylglycinamidine synthase	O15067	145 kDa	41	43	42	42	34	38		71.4718	69.7281	70.6	68.6143	50.0668	59.3406	0.840518	0.350262
FAS_HUMAN Fatty acid synthase	P49327	273 kDa	44	38	41	46	37	41.5		111.86	58.6232	85.2415	74.9676	86.939	80.9533	0.949693	0.88954
TKT_HUMAN Isoform 2 of Transketolase	P29401-2	69 kDa	33	29	31	34	26	30		45.6869	41.3103	43.4986	44.5806	44.495	44.5378	1.02389	0.681723
HMCS1_HUMAN Hydroxymethylglutaryl-CoA synthase, cytoplasmic	Q01581	57 kDa	22	23	22.5	31	33	32		27.4346	25.1249	26.2797	31.2546	40.2778	35.7662	1.36098	0.17856
GLYM_HUMAN Isoform 3 of Serine hydroxymethyltransferase, mitochondrial	P34897-3	53 kDa	22	28	25	29	29	29		29.7719	34.5139	32.1429	28.6102	35.8271	32.2186	1.00236	0.987595
CAH2_HUMAN Carbonic anhydrase 2	P00918	29 kDa	21	19	20	21	18	19.5		50.0703	47.6712	48.8708	48.5705	49.8387	49.2046	1.00683	0.828596
GANAB_HUMAN Neutral alpha-glucosidase AB	Q14697	107 kDa	25	32	28.5	32	33	32.5		39.352	45.3809	42.3664	42.9528	43.1515	43.0521	1.01618	0.841281
K1C16_HUMAN Keratin, type I cytoskeletal 16	P08779	51 kDa	38	42	40	43	23	33		83.1653	87.3592	85.2622	77.3219	45.5934	61.4577	0.720807	0.275247
ALDOA_HUMAN Fructose-bisphosphate aldolase A	P04075	39 kDa	20	28	24	34	34	34		23.8282	28.0709	25.9495	29.4545	41.2102	35.3324	1.36158	0.27205
DHE3_HUMAN Glutamate dehydrogenase 1, mitochondrial	P00367	61 kDa	24	21	22.5	38	28	33		26.6676	23.3102	24.9889	35.2626	32.1223	33.6925	1.3483	0.0632052
A2A274_HUMAN Aconitate hydratase, mitochondrial	A2A274 (+1)	88 kDa	25	23	24	30	30	30		32.9515	26.2844	29.6179	31.4522	31.5366	31.4944	1.06336	0.630212
PUR9_HUMAN Bifunctional purine biosynthesis protein PURH	P31939	65 kDa	22	27	24.5	25	22	23.5		28.4481	31.8127	30.1304	24.398	28.7618	26.5799	0.882163	0.326465
ACLY_HUMAN ATP-citrate synthase	P53396	121 kDa	19	25	22	31	28	29.5		31.6118	32.6298	32.1208	47.5289	38.9889	43.2589	1.34676	0.122307
LDHB_HUMAN L-lactate dehydrogenase B chain	P07195	37 kDa	16	18	17	27	27	27		35.7422	34.0988	34.9205	41.9254	44.3414	43.1334	1.23519	0.030217
HSP71_HUMAN Heat shock 70 kDa protein 1A/1B	P08107	70 kDa	17	16	16.5	20	20	20		32.107	35.1606	33.6338	31.6093	38.2245	34.9169	1.03815	0.758331
SYG_HUMAN Glycine--tRNA ligase	P41250	83 kDa	19	24	21.5	32	22	27		21.5369	25.3371	23.437	38.325	25.2581	31.7915	1.35647	0.344398
PABP1_HUMAN Polyadenylate-binding protein 1	P11940	71 kDa	19	24	21.5	29	28	28.5		21.2477	25.0341	23.1409	24.4128	31.4366	27.9247	1.20672	0.353305
PLST_HUMAN Plastin-3	P13797	71 kDa	24	24	24	28	25	26.5		25.7746	21.5405	23.6576	27.8782	24.0324	25.9553	1.09713	0.506038
GUAA_HUMAN GMP synthase [glutamine-hydrolyzing]	P49915	77 kDa	24	24	24	26	27	26.5		26.3948	25.9797	26.1872	23.9235	26.6504	25.2869	0.965621	0.58091
OAT_HUMAN Ornithine aminotransferase, mitochondrial	P04181	49 kDa	15	16	15.5	26	23	24.5		20.3373	20.5272	20.4322	28.574	31.0617	29.8178	1.45935	0.0172111
G8JLB6_HUMAN Heterogeneous nuclear ribonucleoprotein H	G8JLB6	51 kDa	18	23	20.5	21	25	23		27.0443	35.5901	31.3172	28.8243	44.0127	36.4185	1.16289	0.617516
PDIA4_HUMAN Protein disulfide-isomerase A4	P13667	73 kDa	12	13	12.5	37	32	34.5		14.752	13.333	14.0425	39.7766	40.0616	39.9191	2.84273	0.000781189
HNRPL_HUMAN Heterogeneous nuclear ribonucleoprotein L	P14866	64 kDa	19	22	20.5	24	22	23		25.5393	27.5422	26.5407	21.4605	23.069	22.2648	0.838889	0.0796022
6PGD_HUMAN 6-phosphogluconate dehydrogenase, decarboxylating	P52209	53 kDa	17	16	16.5	19	19	19		18.7375	15.6007	17.1691	25.4327	24.4324	24.9326	1.45218	0.0421428
HS74L_HUMAN Heat shock 70 kDa protein 4L	O95757	95 kDa	22	18	20	26	21	23.5		34.3896	26.7518	30.5707	36.5341	24.887	30.7106	1.00458	0.985799
PUR8_HUMAN Adenylosuccinate lyase	P30566	55 kDa	17	21	19	27	25	26		17.117	18.593	17.855	23.909	27.2518	25.5804	1.43268	0.0516388
U5S1_HUMAN Isoform 2 of 116 kDa U5 small nuclear ribonucleoprotein component	Q15029-2	105 kDa	22	23	22.5	28	21	24.5		31.6118	27.431	29.5214	40.7683	27.0045	33.8864	1.14786	0.605639
TCPQ_HUMAN T-complex protein 1 subunit theta	P50990	60 kDa	23	24	23.5	33	22	27.5		19.5388	18.1818	18.8603	25.2542	21.1481	23.2011	1.23016	0.18248
PRDX4_HUMAN Peroxiredoxin-4	Q13162	31 kDa	17	12	14.5	23	19	21		39.4588	38.7292	39.094	45.7788	58.3668	52.0728	1.33199	0.175752
K2C5_HUMAN Keratin, type II cytoskeletal 5	P13647	62 kDa	24	30	27	26	20	23		95.8146	99.5763	97.6954	76.6777	58.2828	67.4802	0.69072	0.0844802
K1C14_HUMAN Keratin, type I cytoskeletal 14	P02533	52 kDa	24	26	25	28	17	22.5		107.037	103.472	105.255	84.2843	63.1541	73.7192	0.70039	0.0986487
ACTN4_HUMAN Alpha-actinin-4	O43707	105 kDa	21	26	23.5	25	20	22.5		22.4253	22.4247	22.425	23.7911	21.1187	22.4549	1.00133	0.984179
K2C6A_HUMAN Keratin, type II cytoskeletal 6A	P02538	60 kDa	18	27	22.5	26	13	19.5		84.6442	82.6685	83.6563	78.3369	56.3321	67.3345	0.804894	0.277582
LDHA_HUMAN L-lactate dehydrogenase A chain	P00338	37 kDa	11	14	12.5	23	18	20.5		30.612	30.87	30.741	34.3114	38.5886	36.45	1.18571	0.116691
C9J9K3_HUMAN 40S ribosomal protein SA (Fragment)	C9J9K3 (+1)	30 kDa	15	16	15.5	14	19	16.5		27.7448	28.1387	27.9417	18.7582	29.4132	24.0857	0.861997	0.544645
LMNA_HUMAN Isoform C of Prelamin-A/C	P02545-2 (+1)	65 kDa	20	21	20.5	23	21	22		21.2808	23.3237	22.3023	17.3134	22.2705	19.792	0.887443	0.447921
GRP78_HUMAN 78 kDa glucose-regulated protein	P11021	72 kDa	14	15	14.5	19	17	18		24.297	25.833	25.065	21.5436	25.7615	23.6525	0.943649	0.593445
IDHC_HUMAN Isocitrate dehydrogenase [NADP] cytoplasmic	O75874	47 kDa	11	16	13.5	15	15	15		12.922	15.23	14.076	16.361	13.435	14.898	1.0584	0.702218
PREP_HUMAN Presequence protease, mitochondrial	Q5JRX3 (+1)	117 kDa	16	16	16	17	17	17		23.366	21.553	22.4595	27.346	21.332	24.339	1.08368	0.610295
PGM1_HUMAN Phosphoglucomutase-1	P36871	61 kDa	17	17	17	17	14	15.5		20.826	19.167	19.9965	14.639	15.0068	14.8229	0.741274	0.0259257
CH60_HUMAN 60 kDa heat shock protein, mitochondrial	P10809	61 kDa	19	14	16.5	20	19	19.5		17.6326	13.9633	15.798	16.7948	20.2179	18.5064	1.17144	0.393261
TCPB_HUMAN T-complex protein 1 subunit beta	P78371	57 kDa	14	19	16.5	21	14	17.5		12.1246	14.5862	13.3554	19.4153	13.0127	16.214	1.21404	0.492264
ANXA6_HUMAN Annexin A6	P08133	76 kDa	17	18	17.5	19	14	16.5		17.355	20	18.6775	16.9818	14.335	15.6584	0.838356	0.24794
FLNA_HUMAN Filamin-A	P21333 (+1)	281 kDa	15	17	16	27	22	24.5		21.3707	17.7125	19.5416	27.2962	22.5128	24.9045	1.27443	0.216843
ECHM_HUMAN Enoyl-CoA hydratase, mitochondrial	P30084	31 kDa	9	14	11.5	11	9	10		23.5812	28.002	25.7916	19.7878	29.699	24.7434	0.959359	0.864663
GRP75_HUMAN Stress-70 protein, mitochondrial	P38646	74 kDa	18	15	16.5	16	15	15.5		22.562	15.833	19.1975	12.199	13.7237	12.9613	0.675158	0.212389
GDE_HUMAN Glycogen debranching enzyme	P35573	175 kDa	18	21	19.5	16	21	18.5		24.9643	22.4849	23.7246	17.1565	21.9467	19.5516	0.824107	0.261857
CGL_HUMAN Cystathionine gamma-lyase	P32929	45 kDa	14	11	12.5	14	10	12		19.7102	11.9209	15.8156	20.0797	14.9195	17.4996	1.10648	0.753005
PDIA1_HUMAN Protein disulfide-isomerase	P07237	57 kDa	0	0	0	27	24	25.5		0	0	0	26.9707	27.1536	27.0621	Exclusive to +UV	1.14192e-05
IDE_HUMAN Insulin-degrading enzyme	P14735	118 kDa	13	14	13.5	19	18	18.5		18.446	17.634	18.04	21.4759	18.666	20.0709	1.11258	0.299347
E9PH29_HUMAN Thioredoxin-dependent peroxide reductase, mitochondrial	E9PH29 (+1)	26 kDa	8	8	8	11	12	11.5		34.2011	30.859	32.5301	31.6586	41.4339	36.5463	1.12346	0.518223
SF3B3_HUMAN Splicing factor 3B subunit 3	Q15393	136 kDa	19	13	16	19	13	16		35.0773	15.1443	25.1108	27.3211	20.9849	24.153	0.961857	0.935374
E9PBJ5_HUMAN Succinate dehydrogenase [ubiquinone] flavoprotein subunit, mitochondrial	E9PBJ5 (+1)	67 kDa	13	10	11.5	23	17	20		13.539	9.31296	11.426	21.0544	19.0534	20.0539	1.75511	0.0662163
ERP44_HUMAN Endoplasmic reticulum resident protein 44	Q9BS26	47 kDa	10	13	11.5	15	12	13.5		10.0574	14.0959	12.0767	12.097	11.4387	11.7678	0.97443	0.893875
LKHA4_HUMAN Leukotriene A-4 hydrolase	P09960	69 kDa	12	11	11.5	16	15	15.5		14.752	14.167	14.4595	13.8832	16.0227	14.953	1.03413	0.699881
ATPB_HUMAN ATP synthase subunit beta, mitochondrial	P06576	57 kDa	14	12	13	11	12	11.5		12.242	10.965	11.6035	9.95904	11.42	10.6895	0.921232	0.445607
DHX9_HUMAN ATP-dependent RNA helicase A	Q08211	141 kDa	18	14	16	17	11	14		30.623	15.8992	23.2611	23.1106	22.2138	22.6622	0.974254	0.942679
H0YAK1_HUMAN G-rich sequence factor 1 (Fragment)	H0YAK1	51 kDa	8	14	11	12	13	12.5		8.1612	12.5309	10.3461	9.95904	11.5444	10.7517	1.03921	0.877523
MDHM_HUMAN Malate dehydrogenase, mitochondrial	P40926	36 kDa	13	14	13.5	11	9	10		26.3846	17.207	21.7958	15.1203	13.0468	14.0835	0.646159	0.242815
MAOM_HUMAN NAD-dependent malic enzyme, mitochondrial	P23368	65 kDa	11	12	11.5	15	13	14		10.413	12.5	11.4565	12.809	13.538	13.1735	1.14987	0.260545
CATA_HUMAN Catalase	P04040	60 kDa	16	15	15.5	11	18	14.5		12.9458	12.0514	12.4986	7.90362	15.2724	11.588	0.927146	0.829071
EZRI_HUMAN Ezrin	P15311	69 kDa	10	11	10.5	11	11	11		10.413	13.333	11.873	11.589	13.538	12.5635	1.05816	0.73202
EF1A3_HUMAN Putative elongation factor 1-alpha-like 3	Q5VTE0	50 kDa	12	13	12.5	13	18	15.5		16.5671	13.4114	14.9893	10.2038	21.669	15.9364	1.06319	0.888065
HS90B_HUMAN Heat shock protein HSP 90-beta	P08238	83 kDa	13	11	12	14	14	14		14.1023	11.4187	12.7605	15.0806	14.061	14.5708	1.14187	0.334427
PARP1_HUMAN Poly [ADP-ribose] polymerase 1	P09874	113 kDa	12	12	12	17	11	14		10.6204	8.3678	9.4941	13.4656	10.2	11.8328	1.24633	0.359649
ALDH2_HUMAN Aldehyde dehydrogenase, mitochondrial	P05091	56 kDa	11	12	11.5	12	11	11.5		10.201	9.7471	9.97405	8.1805	10.077	9.12875	0.91525	0.477363
CBS_HUMAN Cystathionine beta-synthase	P35520 (+1)	61 kDa	12	10	11	15	14	14.5		10.9055	9.5517	10.2286	11.2821	13.3813	12.3317	1.20561	0.234236
TPR_HUMAN Nucleoprotein TPR	P12270	267 kDa	7	12	9.5	22	12	17		11.0273	12.2119	11.6196	24.7702	12.3064	18.5383	1.59543	0.384228
U3KQK0_HUMAN Histone H2B	U3KQK0	19 kDa	6	3	4.5	10	7	8.5		9.33315	7.02543	8.17929	28.8896	25.0894	26.9895	3.29974	0.0136807
ACOC_HUMAN Cytoplasmic aconitate hydratase	P21399	98 kDa	8	8	8	11	10	10.5		11.068	9.7966	10.4323	21.4274	13.2404	17.3339	1.66156	0.237633
PYGL_HUMAN Isoform 2 of Glycogen phosphorylase, liver form	P06737-2	93 kDa	9	9	9	17	13	15		12.298	8.817	10.5575	20.5738	14.9734	17.7736	1.6835	0.160084
SFPQ_HUMAN Splicing factor, proline- and glutamine-rich	P23246	76 kDa	8	14	11	14	12	13		8.5338	12.0726	10.3032	12.3578	9.7696	11.0637	1.07381	0.76176
RNZ2_HUMAN Isoform 4 of Zinc phosphodiesterase ELAC protein 2	Q9BQ52-4	88 kDa	9	12	10.5	15	13	14		11.3195	12.8418	12.0806	14.9077	12.6361	13.7719	1.14	0.341637
E7EU96_HUMAN Casein kinase II subunit alpha	E7EU96	45 kDa	9	13	11	10	12	11		8.4091	10.956	9.68255	9.9047	12.7989	11.3518	1.1724	0.477797
TCPH_HUMAN T-complex protein 1 subunit eta	Q99832	59 kDa	9	11	10	11	8	9.5		10.0377	10.1609	10.0993	9.1492	8.3863	8.76775	0.868154	0.0748713
TPP2_HUMAN Tripeptidyl-peptidase 2	P29144	138 kDa	11	14	12.5	13	11	12		13.527	13.715	13.621	13.6422	11.4176	12.5299	0.919896	0.431425
MTAP_HUMAN S-methyl-5'-thioadenosine phosphorylase	Q13126	31 kDa	8	7	7.5	8	8	8		15.81	10.515	13.1625	13.567	16.0443	14.8056	1.12484	0.630608
CISY_HUMAN Citrate synthase, mitochondrial	O75390	52 kDa	7	8	7.5	12	7	9.5		6.801	6.7011	6.75105	9.95904	6.93474	8.44689	1.2512	0.378861
PCNA_HUMAN Proliferating cell nuclear antigen	P12004	29 kDa	6	9	7.5	6	4	5		12.161	15.295	13.728	12.598	11.137	11.8675	0.864474	0.394449
RBBP7_HUMAN Histone-binding protein RBBP7	Q16576	48 kDa	9	9	9	12	10	11		8.20475	7.3946	7.79968	8.4682	8.8761	8.67215	1.11186	0.194283
ANXA2_HUMAN Annexin A2	P07355	39 kDa	7	13	10	12	8	10		10.945	16.6179	13.7814	13.1035	11.137	12.1203	0.879463	0.635622
H2AV_HUMAN Histone H2A.V	Q71UI9	14 kDa	6	9	7.5	13	8	10.5		11.3587	13.8319	12.5953	18.0873	19.6537	18.8705	1.49822	0.050336
SIAS_HUMAN Sialic acid synthase	Q9NR45	40 kDa	9	11	10	7	9	8		8.5532	10.1782	9.3657	5.85454	9.7583	7.80642	0.833512	0.537599
G6PD_HUMAN Glucose-6-phosphate 1-dehydrogenase	P11413 (+1)	59 kDa	14	11	12.5	9	8	8.5		9.5213	7.9195	8.7204	6.5071	6.0459	6.2765	0.719749	0.0992816
Q5T6W5_HUMAN Heterogeneous nuclear ribonucleoprotein K	Q5T6W5	48 kDa	1	2	1.5	17	20	18.5		0.6801	1.2184	0.94925	14.049	17.1172	15.5831	16.4162	0.0111392
TBA1B_HUMAN Tubulin alpha-1B chain	P68363	50 kDa	10	11	10.5	10	6	8		10.9252	9.2222	10.0737	7.4458	4.15517	5.80049	0.575806	0.147479
SYNC_HUMAN Asparagine--tRNA ligase, cytoplasmic	O43776	63 kDa	10	9	9.5	15	8	11.5		11.9948	9.6141	10.8044	15.2155	8.903	12.0592	1.11614	0.74562
DHX15_HUMAN Putative pre-mRNA-splicing factor ATP-dependent RNA helicase DHX15	O43143	91 kDa	9	10	9.5	16	7	11.5		9.9073	8.47966	9.19348	14.4951	9.04304	11.7691	1.28015	0.457202
F8W6I7_HUMAN Heterogeneous nuclear ribonucleoprotein A1	F8W6I7 (+3)	33 kDa	7	7	7	8	9	8.5		18.9253	17.293	18.1091	17.5381	25.6453	21.5917	1.19231	0.488322
TBB4B_HUMAN Tubulin beta-4B chain	P68371	50 kDa	8	10	9	10	9	9.5		6.1209	7.9195	7.0202	7.03744	6.84227	6.93985	0.988555	0.937318
H4_HUMAN Histone H4	P62805	11 kDa	3	4	3.5	16	12	14		4.482	5.6577	5.06985	21.0337	19.0302	20.032	3.95119	0.0059723
HNRPF_HUMAN Heterogeneous nuclear ribonucleoprotein F	P52597	46 kDa	7	7	7	9	9	9		10.7374	11.2616	10.9995	11.8705	15.3008	13.5857	1.23511	0.274572
1433E_HUMAN 14-3-3 protein epsilon	P62258	29 kDa	5	10	7.5	7	8	7.5		12.161	13.19	12.6755	9.1283	16.087	12.6076	0.994647	0.98636
PEPD_HUMAN Xaa-Pro dipeptidase	P12955	55 kDa	8	9	8.5	10	6	8		7.4811	6.7011	7.0911	7.0631	6.17047	6.61679	0.933111	0.507514
METK2_HUMAN S-adenosylmethionine synthase isoform type-2	P31153	44 kDa	6	7	6.5	8	11	9.5		5.4408	6.7011	6.07095	7.0146	9.15447	8.08454	1.33168	0.246341
IDHP_HUMAN Isocitrate dehydrogenase [NADP], mitochondrial	P48735	51 kDa	7	10	8.5	13	8	10.5		4.7607	6.7011	5.7309	9.3491	6.7177	8.0334	1.40177	0.294329
MCCB_HUMAN Methylcrotonoyl-CoA carboxylase beta chain, mitochondrial	Q9HCC0	61 kDa	7	12	9.5	9	9	9		4.94835	10.1609	7.55462	7.29372	6.4197	6.85671	0.907618	0.81643
HSP74_HUMAN Heat shock 70 kDa protein 4	P34932	94 kDa	11	10	10.5	10	8	9		19.676	15.5283	17.6022	19.1577	10.666	14.9119	0.847161	0.626543
TALDO_HUMAN Transaldolase	P37837	38 kDa	8	8	8	9	9	9		12.161	10.515	11.338	10.2978	13.1804	11.7391	1.03538	0.831557
M0QWZ7_HUMAN Serine--tRNA ligase, mitochondrial	M0QWZ7 (+1)	58 kDa	9	11	10	8	9	8.5		6.1209	8.5287	7.3248	5.2589	6.0459	5.6524	0.77168	0.31755
UGDH_HUMAN UDP-glucose 6-dehydrogenase	O60701	55 kDa	10	13	11.5	7	9	8		7.4811	7.9195	7.7003	4.6746	6.0459	5.36025	0.696109	0.0830144
AGM1_HUMAN Phosphoacetylglucosamine mutase	O95394	60 kDa	11	8	9.5	8	7	7.5		9.5453	8.3333	8.9393	6.7094	7.1673	6.93835	0.776163	0.0907693
ROA2_HUMAN Heterogeneous nuclear ribonucleoproteins A2/B1	P22626	37 kDa	8	6	7	10	10	10		18.0794	12.9001	15.4898	15.4743	28.7072	22.0907	1.42615	0.450946
UGGG1_HUMAN Isoform 2 of UDP-glucose:glycoprotein glucosyltransferase 1	Q9NYU2-2	175 kDa	8	9	8.5	14	9	11.5		16.289	9.1181	12.7035	14.6552	7.9996	11.3274	0.891672	0.804901
IPYR_HUMAN Inorganic pyrophosphatase	Q15181	33 kDa	10	9	9.5	6	7	6.5		14.594	12.3303	13.4622	7.7527	11.0946	9.42365	0.700011	0.183363
EF1G_HUMAN Elongation factor 1-gamma	P26641	50 kDa	5	5	5	10	9	9.5		4.7607	4.8735	4.8171	8.20614	7.9552	8.08067	1.6775	0.001772
HS105_HUMAN Isoform Beta of Heat shock protein 105 kDa	Q92598-2	92 kDa	6	9	7.5	8	11	9.5		11.068	14.695	12.8815	13.4838	11.555	12.5194	0.97189	0.8763
PYGB_HUMAN Glycogen phosphorylase, brain form	P11216	97 kDa	10	8	9	6	10	8		18.446	10.776	14.611	11.141	14.221	12.681	0.867908	0.686428
AGAL_HUMAN Alpha-galactosidase A	P06280	49 kDa	6	8	7	9	6	7.5		6.30855	6.92523	6.61689	7.03744	4.82697	5.9322	0.896525	0.611252
ANM5_HUMAN Protein arginine N-methyltransferase 5	O14744	73 kDa	7	8	7.5	12	10	11		10.447	8.60286	9.52493	11.8111	13.8721	12.8416	1.34821	0.138588
HXK1_HUMAN Hexokinase-1	P19367	102 kDa	10	8	9	10	5	7.5		14.3947	8.817	11.6059	12.154	4.4442	8.2991	0.715077	0.558943
PLD3_HUMAN Phospholipase D3	Q8IV08	55 kDa	6	8	7	9	11	10		4.4559	6.7643	5.6101	5.9485	10.4968	8.22265	1.46569	0.413366
MK01_HUMAN Mitogen-activated protein kinase 1	P28482	41 kDa	10	9	9.5	6	6	6		13.5212	10.515	12.0181	6.39882	7.5308	6.96481	0.579527	0.087905
ODPA_HUMAN Pyruvate dehydrogenase E1 component subunit alpha, somatic form, mitochondrial	P08559 (+1)	43 kDa	7	7	7	7	10	8.5		7.337	5.22025	6.27862	4.8598	7.9552	6.4075	1.02053	0.951455
H3BLU7_HUMAN Aflatoxin B1 aldehyde reductase member 2 (Fragment)	H3BLU7 (+1)	35 kDa	6	6	6	4	6	5		12.161	7.6476	9.9043	6.7836	12.4805	9.63205	0.972512	0.9471
GSTP1_HUMAN Glutathione S-transferase P	P09211	23 kDa	8	6	7	5	6	5.5		22.677	18.153	20.415	11.598	19.458	15.528	0.760617	0.39387
TCPE_HUMAN T-complex protein 1 subunit epsilon	P48643	60 kDa	5	5	5	11	9	10		4.8312	4.5517	4.69145	8.46512	7.7145	8.08981	1.72437	0.013605
CATD_HUMAN Cathepsin D	P07339	45 kDa	8	10	9	5	5	5		12.4453	14.0494	13.2474	6.39882	7.4248	6.91181	0.52175	0.0218453
KCRU_HUMAN Creatine kinase U-type, mitochondrial	P12532	47 kDa	7	6	6.5	6	7	6.5		7.337	4.8735	6.10525	4.6746	6.0459	5.36025	0.877974	0.649956
HNRPC_HUMAN Isoform C1 of Heterogeneous nuclear ribonucleoproteins C1/C2	P07910-2	32 kDa	7	9	8	10	7	8.5		8.2863	8.4227	8.3545	10.7805	8.7257	9.7531	1.16741	0.307291
SF3B4_HUMAN Splicing factor 3B subunit 4	Q15427	44 kDa	4	6	5	8	5	6.5		4.0806	7.04785	5.56422	6.63834	4.82697	5.73265	1.03027	0.931643
PA2G4_HUMAN Proliferation-associated protein 2G4	Q9UQ80	44 kDa	6	8	7	9	8	8.5		4.7607	6.0919	5.4263	5.846	5.3741	5.61005	1.03386	0.819047
XPP1_HUMAN Isoform 3 of Xaa-Pro aminopeptidase 1	Q9NQW7-3	75 kDa	7	8	7.5	8	8	8		6.942	7.5	7.221	5.4895	6.371	5.93025	0.821251	0.131794
ENPL_HUMAN Endoplasmin	P14625	92 kDa	10	6	8	8	9	8.5		13.6713	5.878	9.77465	8.9195	9.4998	9.20965	0.942197	0.898285
K7ELL7_HUMAN Glucosidase 2 subunit beta	K7ELL7 (+2)	60 kDa	3	5	4	8	11	9.5		3.471	4.1667	3.81885	6.5023	11.3342	8.91825	2.33532	0.171891
GLNA_HUMAN Glutamine synthetase	P15104	42 kDa	6	9	7.5	8	7	7.5		4.7607	6.31603	5.53837	5.05929	5.3741	5.2167	0.94192	0.724428
MAT2B_HUMAN Methionine adenosyltransferase 2 subunit beta	Q9NZL9	38 kDa	5	8	6.5	6	5	5.5		5.5446	11.1242	8.3344	6.7836	9.33407	8.05884	0.966937	0.936606
Q5T5C7_HUMAN Serine--tRNA ligase, cytoplasmic	Q5T5C7	61 kDa	2	9	5.5	10	10	10		1.3602	6.8276	4.0939	6.0994	7.2161	6.65775	1.62626	0.455154
ODO1_HUMAN 2-oxoglutarate dehydrogenase, mitochondrial	Q02218	116 kDa	7	7	7	5	8	6.5		9.8381	8.817	9.32755	5.0641	7.9996	6.53185	0.700275	0.21383
ACADM_HUMAN Medium-chain specific acyl-CoA dehydrogenase, mitochondrial	P11310 (+1)	47 kDa	3	8	5.5	5	6	5.5		3.4005	7.3103	5.3554	4.6746	4.0306	4.3526	0.81275	0.663031
CPSF5_HUMAN Cleavage and polyadenylation specificity factor subunit 5	O43809	26 kDa	8	5	6.5	6	10	8		17.7091	9.0763	13.3927	9.9413	18.9782	14.4597	1.07967	0.880126
RCC1_HUMAN Isoform 2 of Regulator of chromosome condensation	P18754-2	48 kDa	6	8	7	8	7	7.5		4.7607	4.8735	4.8171	4.70014	4.7024	4.70127	0.975954	0.176438
G3V0I5_HUMAN NADH dehydrogenase (Ubiquinone) flavoprotein 1, 51kDa, isoform CRA_c	G3V0I5 (+2)	50 kDa	7	6	6.5	8	8	8		4.7607	4.2643	4.5125	4.6746	5.3741	5.02435	1.11343	0.355051
FUMH_HUMAN Isoform Cytoplasmic of Fumarate hydratase, mitochondrial	P07954-2	50 kDa	6	7	6.5	4	6	5		4.7607	6.0919	5.4263	4.0902	4.0306	4.0604	0.748282	0.176856
TCPG_HUMAN T-complex protein 1 subunit gamma	P49368	61 kDa	7	8	7.5	6	5	5.5		7.8098	6.6667	7.23825	4.2696	4.7782	4.5239	0.624999	0.0492263
ALBU_HUMAN Serum albumin	P02768	69 kDa	3	12	7.5	7	7	7		2.4156	12.4437	7.42966	5.954	6.0369	5.99545	0.806962	0.801762
PA1B3_HUMAN Platelet-activating factor acetylhydrolase IB subunit gamma	Q15102	26 kDa	5	6	5.5	5	5	5		10.2039	12.8039	11.5039	8.1592	11.0518	9.6055	0.834978	0.431919
HNRPQ_HUMAN Isoform 2 of Heterogeneous nuclear ribonucleoprotein Q	O60506-2	66 kDa	7	7	7	7	6	6.5		5.8866	5.8333	5.85995	4.8796	5.5746	5.2271	0.892004	0.21105
PGK1_HUMAN Phosphoglycerate kinase 1	P00558	45 kDa	8	6	7	6	5	5.5		6.1209	4.8735	5.4972	4.0902	3.3588	3.7245	0.677527	0.133767
K2C73_HUMAN Keratin, type II cytoskeletal 73	Q86Y46	59 kDa	6	5	5.5	5	5	5		23.8958	11.8619	17.8788	11.9338	14.6323	13.283	0.742948	0.533776
H2A2C_HUMAN Histone H2A type 2-C	Q16777 (+1)	14 kDa	2	4	3	3	3	3		12.3483	15.7852	14.0667	14.7867	24.7059	19.7463	1.40376	0.39234
ROA3_HUMAN Heterogeneous nuclear ribonucleoprotein A3	P51991	40 kDa	4	7	5.5	6	5	5.5		7.7716	12.0408	9.9062	11.0881	9.8144	10.4513	1.05502	0.829513
PRDX1_HUMAN Peroxiredoxin-1	Q06830	22 kDa	4	3	3.5	11	7	9		12.37	16.337	14.3535	25.1311	26.8399	25.9855	1.8104	0.0327864
EFGM_HUMAN Elongation factor G, mitochondrial	Q96RP9	83 kDa	6	6	6	7	9	8		5.2065	5	5.10325	6.5154	9.79184	8.15362	1.59773	0.204229
RAB2A_HUMAN Ras-related protein Rab-2A	P61019	24 kDa	6	6	6	7	6	6.5		16.493	12.707	14.6	10.6272	13.0098	11.8185	0.809486	0.339645
ATPA_HUMAN ATP synthase subunit alpha, mitochondrial	P25705	60 kDa	8	5	6.5	6	9	7.5		6.7968	4.06435	5.43057	3.5059	6.0459	4.7759	0.879446	0.759134
RL12_HUMAN 60S ribosomal protein L12	P30050	18 kDa	6	6	6	5	3	4		16.493	12.707	14.6	11.598	14.594	13.096	0.896986	0.596841
SYHM_HUMAN Probable histidine--tRNA ligase, mitochondrial	P49590	57 kDa	7	7	7	6	5	5.5		4.7607	5.4827	5.1217	4.0902	3.3588	3.7245	0.7272	0.112828
RS27A_HUMAN Ubiquitin-40S ribosomal protein S27a	P62979	18 kDa	7	4	5.5	9	6	7.5		11.3469	5.41978	8.38334	10.4896	11.2942	10.8919	1.29923	0.489878
B4DGP8_HUMAN Calnexin	B4DGP8	72 kDa	3	8	5.5	7	6	6.5		2.4156	7.0517	4.73365	4.8796	5.3254	5.1025	1.07792	0.888697
XRCC5_HUMAN X-ray repair cross-complementing protein 5	P13010	83 kDa	7	3	5	6	8	7		6.942	2.5	4.721	5.344	11.3397	8.34185	1.76697	0.434176
RTCB_HUMAN tRNA-splicing ligase RtcB homolog	Q9Y3I0	55 kDa	5	9	7	8	4	6		3.4005	6.0919	4.7462	4.6746	2.6871	3.68085	0.775536	0.589395
SYK_HUMAN Lysine--tRNA ligase	Q15046	68 kDa	4	4	4	6	8	7		3.471	4.1667	3.81885	5.4895	7.1673	6.3284	1.65715	0.109806
G5EA52_HUMAN Protein disulfide isomerase family A, member 3, isoform CRA_b	G5EA52	55 kDa	3	3	3	10	10	10		2.0403	2.27589	2.15809	6.87952	7.30854	7.09403	3.28717	0.00244917
TCPA_HUMAN T-complex protein 1 subunit alpha	P17987	60 kDa	5	5	5	6	7	6.5		8.411	4.6141	6.51255	8.1999	10.6386	9.41924	1.44632	0.326582
ILF3_HUMAN Isoform 4 of Interleukin enhancer-binding factor 3	Q12906-4 (+2)	76 kDa	3	2	2.5	9	7	8		2.471	2.5	2.4855	6.9052	7.3523	7.12875	2.86814	0.00231961
BUB3_HUMAN Mitotic checkpoint protein BUB3	O43684 (+1)	37 kDa	7	6	6.5	4	8	6		7.9769	6.6917	7.3343	3.8763	8.7683	6.3223	0.862018	0.727735
GCSP_HUMAN Glycine dehydrogenase (decarboxylating), mitochondrial	P23378	113 kDa	5	6	5.5	7	4	5.5		7.3786	6.8576	7.1181	7.0897	5.333	6.21135	0.872613	0.426626
PP1A_HUMAN Serine/threonine-protein phosphatase PP1-alpha catalytic subunit	P62136 (+1)	38 kDa	6	4	5	4	5	4.5		9.7291	4.7798	7.25445	4.8454	9.8997	7.37255	1.01628	0.976396
TERA_HUMAN Transitional endoplasmic reticulum ATPase	P55072	89 kDa	3	8	5.5	8	5	6.5		3.6893	8.817	6.25315	9.1154	4.4442	6.7798	1.08422	0.893238
GSHR_HUMAN Glutathione reductase, mitochondrial	P00390 (+1)	56 kDa	7	5	6	8	3	5.5		6.30435	4.2643	5.28432	7.0229	3.95247	5.48768	1.03848	0.922221
TRM6_HUMAN tRNA (adenine(58)-N(1))-methyltransferase non-catalytic subunit TRM6	Q9UJA5	56 kDa	4	6	5	7	6	6.5		3.8194	5.60919	4.71429	4.8796	4.65367	4.76663	1.0111	0.959003
ODPB_HUMAN Isoform 2 of Pyruvate dehydrogenase E1 component subunit beta, mitochondrial	P11177-2	37 kDa	3	7	5	5	4	4.5		6.0807	8.6036	7.34215	5.8145	5.62167	5.71809	0.778803	0.327882
FILA2_HUMAN Filaggrin-2	Q5D862	248 kDa	3	9	6	7	5	6		4.13365	9.83699	6.98532	6.9479	5.10327	6.02558	0.862607	0.779161
GMDS_HUMAN GDP-mannose 4,6 dehydratase	O60547	42 kDa	6	6	6	4	8	6		4.0806	4.6955	4.38805	2.72209	6.9085	4.81529	1.09737	0.858638
SYTC_HUMAN Threonine--tRNA ligase, cytoplasmic	P26639	83 kDa	3	6	4.5	11	4	7.5		2.6033	5	3.80165	7.6737	4.8734	6.27355	1.65022	0.311852
LA_HUMAN Lupus La protein	P05455	47 kDa	3	6	4.5	6	7	6.5		2.7204	4.2643	3.49235	3.53154	5.5173	4.52442	1.29552	0.498108
IPYR2_HUMAN Inorganic pyrophosphatase 2, mitochondrial	Q9H2U2	38 kDa	6	6	6	7	2	4.5		10.5745	6.6917	8.6331	8.05572	2.4749	5.26531	0.609898	0.426237
TIPRL_HUMAN TIP41-like protein	O75663	31 kDa	6	5	5.5	7	4	5.5		7.2968	5.7357	6.51625	6.7836	6.1873	6.48545	0.995273	0.973944
HS90A_HUMAN Isoform 2 of Heat shock protein HSP 90-alpha	P07900-2	98 kDa	3	6	4.5	5	9	7		9.7636	13.5243	11.644	12.5792	17.5239	15.0515	1.29265	0.387069
B5MCQ5_HUMAN Protein disulfide-isomerase A6	B5MCQ5	53 kDa	3	5	4	8	6	7		2.0403	3.046	2.54315	5.69489	4.4044	5.04964	1.98559	0.0920472
RFA1_HUMAN Replication protein A 70 kDa DNA-binding subunit	P27694	68 kDa	7	8	7.5	5	2	3.5		4.7607	5.82945	5.29507	4.6828	1.3435	3.01315	0.569048	0.322777
PIMT_HUMAN Protein-L-isoaspartate(D-aspartate) O-methyltransferase	P22061 (+1)	25 kDa	5	5	5	5	6	5.5		12.37	9.0763	10.7232	8.2844	15.8315	12.0579	1.12448	0.776554
H0YN81_HUMAN WD repeat-containing protein 61 (Fragment)	H0YN81 (+1)	32 kDa	6	4	5	3	3	3		9.7291	5.7357	7.7324	4.8454	4.9499	4.89765	0.633393	0.291642
BLVRB_HUMAN Flavin reductase (NADPH)	P30043	22 kDa	5	4	4.5	3	4	3.5		12.37	10.892	11.631	9.9413	12.161	11.0511	0.950146	0.70608
PSA_HUMAN Puromycin-sensitive aminopeptidase	P55786	103 kDa	4	7	5.5	6	5	5.5		4.9191	6.8576	5.88835	7.0897	4.4442	5.76695	0.979383	0.947724
THOP1_HUMAN Thimet oligopeptidase	P52888	79 kDa	4	6	5	4	4	4		4.3388	5.8333	5.08605	3.0497	4.7782	3.91395	0.769546	0.412807
NDKB_HUMAN Isoform 3 of Nucleoside diphosphate kinase B	P22392-2	30 kDa	5	6	5.5	4	6	5		9.4624	7.7792	8.6208	5.93969	15.4828	10.7113	1.24249	0.708197
AMRP_HUMAN Alpha-2-macroglobulin receptor-associated protein	P30533	41 kDa	5	5	5	2	5	3.5		5.6887	5.3047	5.4967	1.1686	5.8337	3.50115	0.636955	0.483675
PUR1_HUMAN Amidophosphoribosyltransferase	Q06203	57 kDa	5	4	4.5	9	4	6.5		3.4005	2.4368	2.91865	5.387	2.6871	4.03705	1.38319	0.516921
U2AF2_HUMAN Splicing factor U2AF 65 kDa subunit	P26368 (+1)	54 kDa	4	4	4	7	4	5.5		3.4005	2.4368	2.91865	4.1415	4.0306	4.08605	1.39998	0.137817
E9PF18_HUMAN Hydroxyacyl-coenzyme A dehydrogenase, mitochondrial	E9PF18	35 kDa	2	3	2.5	10	2	6		3.6484	5.7357	4.69205	9.30612	3.7124	6.50926	1.3873	0.604632
MPPB_HUMAN Mitochondrial-processing peptidase subunit beta	O75439	54 kDa	4	5	4.5	7	4	5.5		2.7204	3.046	2.8832	5.2589	2.6871	3.973	1.37798	0.488967
AL1B1_HUMAN Aldehyde dehydrogenase X, mitochondrial	P30837	57 kDa	4	6	5	3	6	4.5		3.4005	4.2643	3.8324	1.753	4.7024	3.2277	0.842214	0.731924
PRPS1_HUMAN Ribose-phosphate pyrophosphokinase 1	P60891	35 kDa	3	5	4	3	3	3		6.0807	7.6476	6.86415	3.8763	6.1873	5.0318	0.733055	0.319738
WDR1_HUMAN WD repeat-containing protein 1	O75083	66 kDa	4	8	6	6	3	4.5		4.80005	6.2184	5.50922	4.75692	4.07707	4.417	0.801745	0.299323
SND1_HUMAN Staphylococcal nuclease domain-containing protein 1	Q7KZF4	102 kDa	5	6	5.5	6	4	5		4.7008	5.2926	4.9967	4.8683	3.27794	4.07312	0.815162	0.390045
DX39B_HUMAN Spliceosome RNA helicase DDX39B	Q13838	49 kDa	3	5	4	5	5	5		4.0764	3.6552	3.8658	4.6801	5.296	4.98805	1.2903	0.0950233
E9PEX6_HUMAN Dihydrolipoyl dehydrogenase, mitochondrial	E9PEX6 (+1)	52 kDa	5	3	4	6	3	4.5		4.0806	2.4368	3.2587	6.4386	2.6871	4.56285	1.40021	0.589409
PNPH_HUMAN Purine nucleoside phosphorylase	P00491	32 kDa	4	6	5	6	4	5		4.8645	5.7357	5.3001	6.9859	4.9499	5.9679	1.126	0.607726
THIL_HUMAN Acetyl-CoA acetyltransferase, mitochondrial	P24752	45 kDa	5	4	4.5	4	4	4		4.0806	3.046	3.5633	2.9216	3.3588	3.1402	0.881262	0.529826
SERC_HUMAN Phosphoserine aminotransferase	Q9Y617	40 kDa	4	9	6.5	5	2	3.5		4.8645	9.5595	7.212	4.8454	2.4749	3.66015	0.507508	0.309334
SP16H_HUMAN FACT complex subunit SPT16	Q9Y5B9	120 kDa	3	2	2.5	10	6	8		6.1082	2.5616	4.3349	11.714	9.8422	10.7781	2.48635	0.0847194
DDB1_HUMAN DNA damage-binding protein 1	Q16531	127 kDa	2	5	3.5	6	7	6.5		3.2659	5.35423	4.31006	6.7112	9.228	7.9696	1.84907	0.154639
ANM1_HUMAN Isoform 3 of Protein arginine N-methyltransferase 1	Q99873-3	40 kDa	4	7	5.5	3	3	3		5.9684	7.01835	6.49338	5.8571	6.5615	6.2093	0.956252	0.697173
NHLC2_HUMAN NHL repeat-containing protein 2	Q8NBF2	79 kDa	5	4	4.5	5	5	5		5.5071	4.1667	4.8369	4.5755	6.5138	5.54465	1.14632	0.609076
PLOD2_HUMAN Isoform 2 of Procollagen-lysine,2-oxoglutarate 5-dioxygenase 2	O00469-2	87 kDa	5	4	4.5	6	5	5.5		5.78685	3.9187	4.85278	5.67404	4.35177	5.0129	1.033	0.901537
SYCC_HUMAN Isoform 3 of Cysteine--tRNA ligase, cytoplasmic	P49589-3	95 kDa	4	3	3.5	5	6	5.5		4.3388	3.3333	3.83605	3.4526	4.9632	4.2079	1.09694	0.721657
QCR1_HUMAN Cytochrome b-c1 complex subunit 1, mitochondrial	P31930	53 kDa	4	5	4.5	6	3	4.5		3.4005	3.046	3.22325	4.11584	2.0153	3.06557	0.95108	0.895889
KAP2_HUMAN cAMP-dependent protein kinase type II-alpha regulatory subunit	P13861 (+1)	46 kDa	4	5	4.5	5	5	5		2.7204	3.6552	3.1878	2.9216	3.3588	3.1402	0.985068	0.934908
DHTK1_HUMAN Probable 2-oxoglutarate dehydrogenase E1 component DHKTD1, mitochondrial	Q96HY7	103 kDa	6	6	6	4	4	4		7.3786	5.878	6.6283	4.0513	3.5554	3.80335	0.573805	0.0701161
ILF2_HUMAN Interleukin enhancer-binding factor 2	Q12905	43 kDa	3	5	4	4	3	3.5		2.0403	3.6552	2.84775	4.0902	2.6871	3.38865	1.18994	0.663307
B5MDF5_HUMAN GTP-binding nuclear protein Ran	B5MDF5 (+1)	26 kDa	4	3	3.5	6	6	6		5.6845	3.7272	4.70585	6.4215	8.6335	7.5275	1.5996	0.196228
DPYL2_HUMAN Dihydropyrimidinase-related protein 2	Q16555	62 kDa	4	3	3.5	7	4	5.5		4.3388	2.5	3.4194	4.2696	3.06087	3.66524	1.07189	0.843943
BACH_HUMAN Isoform 4 of Cytosolic acyl coenzyme A thioester hydrolase	O00154-4	37 kDa	3	3	3	6	6	6		6.1082	3.17079	4.6395	8.1999	9.8422	9.02105	1.9444	0.121239
XRCC6_HUMAN X-ray repair cross-complementing protein 6	P12956	70 kDa	4	5	4.5	6	3	4.5		3.471	4.1667	3.81885	4.2696	2.3891	3.32935	0.87182	0.673649
ANXA5_HUMAN Annexin A5	P08758	36 kDa	5	4	4.5	5	5	5		6.0807	3.8238	4.95225	4.8454	6.1873	5.51635	1.11391	0.709295
NQO2_HUMAN Ribosyldihydronicotinamide dehydrogenase [quinone]	P16083	26 kDa	3	5	4	3	4	3.5		10.308	10.892	10.6	4.9706	12.161	8.5658	0.808094	0.62959
RBBP4_HUMAN Histone-binding protein RBBP4	Q09028 (+1)	48 kDa	2	3	2.5	5	4	4.5		6.801	6.0919	6.44645	8.1015	8.65204	8.37677	1.29944	0.0500474
PABP4_HUMAN Isoform 3 of Polyadenylate-binding protein 4	Q13310-3	72 kDa	2	3	2.5	9	4	6.5		11.3979	13.431	12.4145	13.7981	14.9306	14.3643	1.15707	0.235782
OLA1_HUMAN Obg-like ATPase 1	Q9NTK5	45 kDa	1	3	2	6	7	6.5		0.6801	1.8276	1.25385	3.53154	5.6233	4.57742	3.65069	0.1083
PRDX2_HUMAN Peroxiredoxin-2	P32119	22 kDa	2	2	2	6	4	5		6.1848	7.261	6.7229	12.5671	15.8734	14.2202	2.1152	0.0497893
ERO1A_HUMAN ERO1-like protein alpha	Q96HE7	54 kDa	4	5	4.5	6	3	4.5		2.7204	3.046	2.8832	3.5828	2.0153	2.79905	0.970814	0.92587
NT5D3_HUMAN 5'-nucleotidase domain-containing protein 3	Q86UY8	63 kDa	5	4	4.5	6	3	4.5		3.4005	2.4368	2.91865	4.6801	2.0153	3.3477	1.147	0.790621
IDI1_HUMAN Isoform 2 of Isopentenyl-diphosphate Delta-isomerase 1	Q13907-2	32 kDa	4	3	3.5	3	6	4.5		10.308	5.4458	7.8769	6.6275	12.204	9.41575	1.19536	0.717807
DSG1_HUMAN Desmoglein-1	Q02413	114 kDa	1	6	3.5	7	2	4.5		1.2298	9.94526	5.58753	7.3079	1.7777	4.5428	0.813025	0.858305
SYFB_HUMAN Phenylalanine--tRNA ligase beta subunit	Q9NSD9	66 kDa	6	5	5.5	4	3	3.5		5.2065	4.1667	4.6866	2.4398	2.3891	2.41445	0.515182	0.0486801
MMSA_HUMAN Methylmalonate-semialdehyde dehydrogenase [acylating], mitochondrial	Q02252	58 kDa	4	4	4	3	5	4		3.4005	2.4368	2.91865	2.3373	3.3588	2.84805	0.975811	0.929083
UCRI_HUMAN Cytochrome b-c1 complex subunit Rieske, mitochondrial	P47985	30 kDa	2	2	2	2	3	2.5		8.2463	12.707	10.4766	3.3138	12.161	7.7374	0.738538	0.635862
SRC8_HUMAN Src substrate cortactin	Q14247	62 kDa	4	4	4	4	5	4.5		3.8194	4.33639	4.07789	2.41412	5.93427	4.1742	1.02362	0.96175
F8WJN3_HUMAN Cleavage and polyadenylation-specificity factor subunit 6	F8WJN3	52 kDa	5	4	4.5	3	3	3		9.2972	6.40175	7.84947	3.89812	7.96857	5.93335	0.755891	0.523163
UAP1_HUMAN Isoform 3 of UDP-N-acetylhexosamine pyrophosphorylase	Q16222-3	59 kDa	5	6	5.5	3	3	3		3.9635	4.3276	4.14555	1.80422	2.13987	1.97205	0.475702	0.0127302
GLYC_HUMAN Serine hydroxymethyltransferase, cytosolic	P34896	53 kDa	1	4	2.5	6	6	6		3.1005	3.8735	3.487	9.3658	11.5606	10.4632	3.00063	0.0267055
ECHA_HUMAN Trifunctional enzyme subunit alpha, mitochondrial	P40939	83 kDa	4	3	3.5	5	4	4.5		3.471	2.5	2.9855	3.6597	3.27794	3.46882	1.16189	0.452006
PUR6_HUMAN Multifunctional protein ADE2	P22234	47 kDa	1	2	1.5	7	6	6.5		0.6801	1.2184	0.94925	4.6773	4.7024	4.68985	4.94058	0.00514855
TSR1_HUMAN Pre-rRNA-processing protein TSR1 homolog	Q2NL82	92 kDa	4	3	3.5	4	4	4		4.9191	3.9187	4.4189	5.0641	3.5554	4.30975	0.975299	0.915037
ODBA_HUMAN 2-oxoisovalerate dehydrogenase subunit alpha, mitochondrial	P12694	50 kDa	3	5	4	4	3	3.5		2.0403	3.6552	2.84775	2.9216	2.0153	2.46845	0.866807	0.721772
TCPZ_HUMAN T-complex protein 1 subunit zeta	P40227	58 kDa	4	3	3.5	6	2	4		4.3285	3.47709	3.9028	4.7371	2.4749	3.606	0.923953	0.828911
QORL1_HUMAN Quinone oxidoreductase-like protein 1	O95825	39 kDa	3	7	5	2	4	3		2.0403	4.9579	3.4991	1.1686	3.2528	2.2107	0.631791	0.54697
PITH1_HUMAN PITH domain-containing protein 1	Q9GZP4	24 kDa	4	4	4	4	3	3.5		10.308	7.261	8.7845	6.6275	6.102	6.36475	0.724543	0.258017
GTPC1_HUMAN Putative GTP cyclohydrolase 1 type 2 NIF3L1	Q9GZT8 (+1)	42 kDa	3	4	3.5	4	4	4		3.6484	4.7798	4.2141	3.8763	4.9499	4.4131	1.04722	0.822431
PSA2_HUMAN Proteasome subunit alpha type-2	P25787	26 kDa	4	2	3	3	2	2.5		10.308	5.4458	7.8769	6.6275	9.7291	8.1783	1.03826	0.926293
MPPA_HUMAN Mitochondrial-processing peptidase subunit alpha	Q10713	58 kDa	5	5	5	1	4	2.5		3.4005	3.6552	3.52785	0.58432	2.6871	1.63571	0.463656	0.215917
TCPD_HUMAN T-complex protein 1 subunit delta	P50991	58 kDa	3	4	3.5	5	3	4		2.5763	3.10919	2.84274	3.0497	3.14667	3.09818	1.08986	0.445137
F10A1_HUMAN Hsc70-interacting protein	P50502	41 kDa	4	4	4	3	4	3.5		3.2564	2.4368	2.8466	1.753	3.2528	2.5029	0.879259	0.726455
RS10_HUMAN 40S ribosomal protein S10	P46783	19 kDa	3	2	2.5	3	2	2.5		10.308	5.4458	7.8769	7.59659	4.8645	6.23055	0.790989	0.614756
SYFA_HUMAN Phenylalanine--tRNA ligase alpha subunit	Q9Y285	58 kDa	2	4	3	3	4	3.5		2.0403	4.1667	3.1035	1.8298	2.6871	2.25845	0.727711	0.537774
J3QKR3_HUMAN Proteasome subunit beta type-3 (Fragment)	J3QKR3	16 kDa	2	2	2	3	2	2.5		6.1848	5.4458	5.8153	8.2844	9.7291	9.00675	1.5488	0.0589743
FUCO_HUMAN Tissue alpha-L-fucosidase	P04066	54 kDa	3	5	4	2	3	2.5		2.7204	3.6552	3.1878	1.1686	2.0153	1.59195	0.499388	0.127066
TSN_HUMAN Translin	Q15631	26 kDa	4	2	3	3	4	3.5		8.2463	5.4458	6.84605	6.6275	9.7291	8.1783	1.1946	0.588981
1433Z_HUMAN 14-3-3 protein zeta/delta	P63104	28 kDa	4	5	4.5	2	3	2.5		12.6361	11.0848	11.8605	8.8469	8.6623	8.7546	0.738134	0.0578209
5NTC_HUMAN Cytosolic purine 5'-nucleotidase	P49902	65 kDa	3	3	3	5	3	4		2.4156	2.27589	2.34574	3.0497	2.26447	2.65709	1.13273	0.516698
F5H039_HUMAN Molybdopterin molybdenumtransferase	F5H039	85 kDa	3	3	3	4	4	4		2.9653	2.939	2.95215	3.64844	3.46287	3.55565	1.20443	0.0232734
PAIRB_HUMAN Plasminogen activator inhibitor 1 RNA-binding protein	Q8NC51 (+1)	45 kDa	1	2	1.5	3	4	3.5		1.3602	2.17435	1.76728	3.13246	4.04917	3.59082	2.03184	0.0968697
ULA1_HUMAN Isoform 2 of NEDD8-activating enzyme E1 regulatory subunit	Q13564-2	59 kDa	1	5	3	5	3	4		0.86775	4.1667	2.51722	3.40889	2.3891	2.899	1.15166	0.845518
EF1D_HUMAN Elongation factor 1-delta	P29692	31 kDa	3	3	3	3	3	3		3.6484	2.8679	3.25815	3.8763	4.9499	4.4131	1.35448	0.22394
AATM_HUMAN Aspartate aminotransferase, mitochondrial	P00505	48 kDa	4	3	3.5	3	4	3.5		2.7204	1.8276	2.274	1.753	2.6871	2.22005	0.976275	0.941056
TRMB_HUMAN tRNA (guanine-N(7)-)-methyltransferase	Q9UBP6	31 kDa	4	4	4	3	2	2.5		4.8645	3.8238	4.34415	3.8763	2.4749	3.1756	0.731006	0.312498
ECH1_HUMAN Delta(3,5)-Delta(2,4)-dienoyl-CoA isomerase, mitochondrial	Q13011	36 kDa	5	3	4	2	2	2		6.0807	3.8238	4.95225	1.9382	3.7124	2.8253	0.570508	0.27659
SEC13_HUMAN Protein SEC13 homolog	P55735	36 kDa	3	6	4.5	2	3	2.5		3.6484	5.7357	4.69205	1.9382	3.7124	2.8253	0.602146	0.306087
GDIB_HUMAN Rab GDP dissociation inhibitor beta	P50395	51 kDa	3	5	4	3	2	2.5		2.0403	3.6552	2.84775	1.753	1.3435	1.54825	0.543675	0.25912
APT_HUMAN Adenine phosphoribosyltransferase	P07741	20 kDa	4	4	4	4	1	2.5		10.308	7.261	8.7845	6.6275	2.4323	4.5299	0.51567	0.242464
RUVB1_HUMAN RuvB-like 1	Q9Y265	50 kDa	3	5	4	1	5	3		2.0403	3.046	2.54315	0.58432	3.3588	1.97156	0.775243	0.735819
PGM2_HUMAN Phosphoglucomutase-2	Q96G03	68 kDa	4	4	4	5	1	3		3.471	3.3333	3.40215	3.0497	0.79637	1.92304	0.565241	0.320334
COR1C_HUMAN Isoform 3 of Coronin-1C	Q9ULV4-3	59 kDa	1	2	1.5	6	2	4		0.6801	1.2184	0.94925	7.0229	2.31217	4.66753	4.91708	0.257323
DPP9_HUMAN Isoform 2 of Dipeptidyl peptidase 9	Q86TI2-2	102 kDa	3	5	4	4	1	2.5		4.4956	5.5006	4.9981	4.6856	1.6404	3.163	0.63284	0.370907
ELAV1_HUMAN ELAV-like protein 1	Q15717	36 kDa	1	5	3	3	4	3.5		1.2161	5.6391	3.4276	2.9073	4.9499	3.9286	1.14617	0.856083
ADK_HUMAN Adenosine kinase	P55263	41 kDa	3	4	3.5	1	5	3		2.5763	2.4368	2.50655	0.58432	3.3588	1.97156	0.786563	0.737219
SODM_HUMAN Superoxide dismutase [Mn], mitochondrial	P04179	25 kDa	3	3	3	3	3	3		6.1848	5.4458	5.8153	4.9706	9.7291	7.34985	1.26388	0.589134
CI064_HUMAN UPF0553 protein C9orf64	Q5T6V5	39 kDa	2	5	3.5	2	4	3		2.4323	4.7798	3.60605	1.9382	4.9499	3.44405	0.955075	0.94011
H0YNW5_HUMAN Deoxyuridine 5'-triphosphate nucleotidohydrolase, mitochondrial	H0YNW5	18 kDa	4	3	3.5	1	5	3		8.2463	5.4458	6.84605	1.6569	12.161	6.90895	1.00919	0.991818
PPIB_HUMAN Peptidyl-prolyl cis-trans isomerase B	P23284	24 kDa	2	4	3	1	3	2		6.1848	9.0763	7.63055	1.6569	9.7291	5.693	0.74608	0.695599
RPP30_HUMAN Isoform 2 of Ribonuclease P protein subunit p30	P78346-2	36 kDa	2	5	3.5	3	2	2.5		2.4323	4.7798	3.60605	3.1096	2.4749	2.79225	0.774324	0.572221
ARP3_HUMAN Actin-related protein 3	P61158	47 kDa	2	2	2	5	3	4		1.3602	1.2184	1.2893	2.94724	2.0153	2.48127	1.92451	0.127201
SYAC_HUMAN Alanine--tRNA ligase	P49588	107 kDa	2	3	2.5	3	4	3.5		2.4595	2.939	2.69925	3.0385	3.5554	3.29695	1.22143	0.232074
RM48_HUMAN 39S ribosomal protein L48, mitochondrial	Q96GC5	24 kDa	2	2	2	3	3	3		6.1848	5.4458	5.8153	4.9706	7.2968	6.1337	1.05475	0.818576
PSME4_HUMAN Proteasome activator complex subunit 4	Q14997	211 kDa	3	2	2.5	5	2	3.5		6.1082	2.5616	4.3349	5.8571	3.2807	4.5689	1.05398	0.924723
ETFA_HUMAN Electron transfer flavoprotein subunit alpha, mitochondrial	P13804	35 kDa	4	3	3.5	3	1	2		4.8645	3.8238	4.34415	2.9073	1.2375	2.0724	0.477055	0.147217
FUBP2_HUMAN Far upstream element-binding protein 2	Q92945	73 kDa	0	0	0	8	3	5.5		0	0	0	6.0369	3.90044	4.96867	Exclusive to +UV	0.0432458
RAB21_HUMAN Ras-related protein Rab-21	Q9UL25	24 kDa	2	3	2.5	2	3	2.5		5.3393	5.4458	5.39255	2.8283	7.2968	5.06255	0.938804	0.896154
HIBCH_HUMAN 3-hydroxyisobutyryl-CoA hydrolase, mitochondrial	Q6NVY1	43 kDa	2	2	2	3	4	3.5		2.4323	1.9119	2.1721	2.9073	4.9499	3.9286	1.80866	0.237515
GRHPR_HUMAN Glyoxylate reductase/hydroxypyruvate reductase	Q9UBQ7	36 kDa	2	2	2	4	3	3.5		2.4323	1.9119	2.1721	3.8763	3.7124	3.79435	1.74686	0.0271327
CALR_HUMAN Calreticulin	P27797	48 kDa	2	3	2.5	3	2	2.5		1.3602	1.8276	1.5939	1.753	2.0153	1.88415	1.1821	0.391974
RAB5C_HUMAN Ras-related protein Rab-5C	P51148	23 kDa	3	3	3	3	2	2.5		6.1848	5.4458	5.8153	4.9706	4.8645	4.91755	0.845623	0.137991
IF5A1_HUMAN Eukaryotic translation initiation factor 5A-1	P63241	17 kDa	1	2	1.5	3	3	3		2.0616	3.6305	2.84605	4.9706	12.161	8.5658	3.00972	0.260332
SCOT1_HUMAN Succinyl-CoA:3-ketoacid coenzyme A transferase 1, mitochondrial	P55809	56 kDa	2	1	1.5	2	4	3		2.0403	1.2184	1.62935	1.1686	2.6871	1.92785	1.1832	0.76251
K1C12_HUMAN Keratin, type I cytoskeletal 12	Q99456	54 kDa	2	2	2	4	2	3		6.1082	4.4735	5.29085	3.69392	2.52924	3.11158	0.588106	0.162041
IMB1_HUMAN Importin subunit beta-1	Q14974	97 kDa	2	3	2.5	2	2	2		1.7355	2.42218	2.07884	1.8298	1.46814	1.64897	0.793216	0.383348
1433G_HUMAN 14-3-3 protein gamma	P61981	28 kDa	1	5	3	2	2	2		7.2968	9.3662	8.3315	4.8454	7.4248	6.1351	0.736374	0.315362
H0YA96_HUMAN Heterogeneous nuclear ribonucleoprotein D0 (Fragment)	H0YA96	24 kDa	1	0	0.5	3	6	4.5		1.2161	0	0.60805	1.80422	4.72097	3.2626	5.36567	0.234966
E7EUC7_HUMAN UTP--glucose-1-phosphate uridylyltransferase	E7EUC7	58 kDa	2	2	2	3	3	3		1.3602	1.2184	1.2893	1.753	2.0153	1.88415	1.46137	0.0574555
B4DUS9_HUMAN 3'(2'),5'-bisphosphate nucleotidase 1	B4DUS9 (+1)	29 kDa	3	3	3	2	2	2		3.6484	2.8679	3.25815	1.9382	2.4749	2.20655	0.67724	0.156552
PDXK_HUMAN Pyridoxal kinase	O00764	35 kDa	1	3	2	2	3	2.5		1.2161	3.8238	2.51995	1.9382	3.7124	2.8253	1.12117	0.864352
NAKD2_HUMAN NAD kinase 2, mitochondrial	Q4G0N4	49 kDa	4	2	3	1	3	2		2.7204	1.2184	1.9694	0.58432	2.0153	1.29981	0.660003	0.584754
ACOX1_HUMAN Peroxisomal acyl-coenzyme A oxidase 1	Q15067 (+1)	74 kDa	2	4	3	1	3	2		1.3602	2.4368	1.8985	0.58432	2.0153	1.29981	0.684651	0.572562
PLCG1_HUMAN 1-phosphatidylinositol 4,5-bisphosphate phosphodiesterase gamma-1	P19174 (+1)	149 kDa	1	3	2	3	3	3		1.2298	2.939	2.0844	3.3556	2.6665	3.01105	1.44456	0.420481
PP1R7_HUMAN Protein phosphatase 1 regulatory subunit 7	Q15435	42 kDa	1	3	2	2	2	2		1.3602	2.4368	1.8985	1.1686	1.3435	1.25605	0.661601	0.359968
PTN11_HUMAN Isoform 2 of Tyrosine-protein phosphatase non-receptor type 11	Q06124-2	68 kDa	2	1	1.5	4	2	3		1.7355	0.83333	1.28442	3.0497	1.5927	2.3212	1.8072	0.349886
PURA2_HUMAN Adenylosuccinate synthetase isozyme 2	P30520	50 kDa	4	2	3	0	4	2		2.7204	1.2184	1.9694	0	2.6871	1.34355	0.682213	0.723679
LMNB1_HUMAN Lamin-B1	P20700	66 kDa	4	0	2	3	3	3		4.3388	0	2.1694	2.4398	2.3891	2.41445	1.11296	0.920386
MAOX_HUMAN NADP-dependent malic enzyme	P48163	64 kDa	3	2	2.5	5	0	2.5		2.6033	1.6667	2.135	3.0497	0	1.52485	0.714215	0.738909
TRY3_HUMAN Isoform D of Trypsin-3	P35030-4	28 kDa	1	6	3.5	1	1	1		2.0361	6.9217	4.4789	1.1714	1.6404	1.4059	0.313894	0.337072
PSA3_HUMAN Proteasome subunit alpha type-3	P25788 (+1)	28 kDa	2	2	2	3	2	2.5		3.2777	3.6305	3.4541	4.28289	3.6698	3.97635	1.1512	0.277797
DDX17_HUMAN Probable ATP-dependent RNA helicase DDX17	Q92841	80 kDa	1	3	2	2	3	2.5		0.6801	2.27589	1.47799	1.19426	2.26447	1.72937	1.17008	0.818074
F2Z2V0_HUMAN Copine-1 (Fragment)	F2Z2V0 (+1)	59 kDa	2	2	2	3	2	2.5		1.3602	1.44252	1.40136	1.8298	1.3435	1.58665	1.13222	0.53082
F8WCF6_HUMAN Actin-related protein 2/3 complex subunit 4	F8WCF6	21 kDa	3	2	2.5	2	2	2		6.1848	3.6305	4.90765	2.8283	4.8645	3.8464	0.783756	0.582506
FSCN1_HUMAN Fascin	Q16658	55 kDa	1	3	2	3	2	2.5		0.6801	1.8276	1.25385	2.34	1.3435	1.84175	1.46888	0.520063
FCL_HUMAN GDP-L-fucose synthase	Q13630	36 kDa	2	3	2.5	2	2	2		2.4323	2.8679	2.6501	1.9382	2.4749	2.20655	0.832629	0.327981
MCTS1_HUMAN Malignant T-cell-amplified sequence 1	Q9ULC4	21 kDa	1	2	1.5	2	2	2		2.0616	3.6305	2.84605	3.3138	9.7291	6.52145	2.2914	0.381541
HNRPR_HUMAN Heterogeneous nuclear ribonucleoprotein R	O43390	71 kDa	2	1	1.5	4	2	3		3.471	2.5	2.9855	3.6597	3.1855	3.4226	1.14641	0.503459
RL3_HUMAN 60S ribosomal protein L3	P39023	46 kDa	2	2	2	4	1	2.5		4.0722	1.88999	2.98109	4.6856	1.6404	3.163	1.06102	0.931494
CBR1_HUMAN Carbonyl reductase [NADPH] 1	P16152	30 kDa	3	1	2	2	3	2.5		3.6484	0.95595	2.30218	1.9382	3.7124	2.8253	1.22723	0.776373
TSNAX_HUMAN Translin-associated protein X	Q99598	33 kDa	1	1	1	3	2	2.5		2.4323	1.9119	2.1721	2.9073	2.4749	2.6911	1.23894	0.264738
XPP3_HUMAN Isoform 2 of Probable Xaa-Pro aminopeptidase 3	Q9NQH7-2 (+1)	48 kDa	1	2	1.5	2	2	2		0.6801	1.8276	1.25385	1.1686	2.0153	1.59195	1.26965	0.682103
GNS_HUMAN N-acetylglucosamine-6-sulfatase	P15586	62 kDa	1	2	1.5	2	3	2.5		0.86775	1.44252	1.15514	1.57903	2.26447	1.92175	1.66366	0.228663
1433B_HUMAN 14-3-3 protein beta/alpha	P31946 (+1)	28 kDa	2	4	3	1	1	1		8.5129	9.3662	8.93955	4.9706	6.1873	5.57895	0.624075	0.0455718
F8VYE8_HUMAN Serine/threonine-protein phosphatase	F8VYE8 (+2)	35 kDa	2	2	2	2	2	2		9.7291	6.6917	8.2104	6.7836	11.137	8.9603	1.09134	0.804086
PSB5_HUMAN Proteasome subunit beta type-5	P28074	28 kDa	1	2	1.5	2	3	2.5		2.0616	3.6305	2.84605	3.3138	7.2968	5.3053	1.86409	0.369439
HPRT_HUMAN Hypoxanthine-guanine phosphoribosyltransferase	P00492	25 kDa	2	1	1.5	3	2	2.5		4.1232	1.8153	2.96925	4.9706	4.8645	4.91755	1.65616	0.23373
CAZA2_HUMAN F-actin-capping protein subunit alpha-2	P47755	33 kDa	2	1	1.5	1	4	2.5		2.4323	0.95595	1.69413	0.96909	4.9499	2.9595	1.74692	0.611608
TRM61_HUMAN tRNA (adenine(58)-N(1))-methyltransferase catalytic subunit TRMT61A	Q96FX7	31 kDa	2	1	1.5	2	2	2		2.4323	0.95595	1.69413	1.9382	3.7124	2.8253	1.6677	0.430357
PTBP1_HUMAN Polypyrimidine tract-binding protein 1	P26599 (+2)	57 kDa	1	2	1.5	3	2	2.5		0.6801	1.2184	0.94925	1.753	1.3435	1.54825	1.63102	0.218531
NAGK_HUMAN Isoform 2 of N-acetyl-D-glucosamine kinase	Q9UJ70-2	42 kDa	1	3	2	2	2	2		1.2161	2.8679	2.042	1.9382	2.4749	2.20655	1.08058	0.8672
PP2AA_HUMAN Serine/threonine-protein phosphatase 2A catalytic subunit alpha isoform	P67775	36 kDa	1	2	1.5	2	2	2		1.2161	1.9119	1.564	1.9382	3.7124	2.8253	1.80646	0.316651
PSA7_HUMAN Proteasome subunit alpha type-7	O14818	28 kDa	1	3	2	2	2	2		1.2161	2.8679	2.042	1.9382	2.4749	2.20655	1.08058	0.8672
MOES_HUMAN Moesin	P26038	68 kDa	1	2	1.5	2	2	2		4.3388	6.6667	5.50275	3.6597	6.371	5.01535	0.911426	0.810605
NIT1_HUMAN Isoform 5 of Nitrilase homolog 1	Q86X76-4	34 kDa	2	3	2.5	2	0	1		2.4323	3.8238	3.12805	2.14049	0	1.07024	0.342144	0.248272
CLU_HUMAN Clustered mitochondria protein homolog	O75153	147 kDa	3	1	2	4	0	2		3.6893	0.97966	2.33448	4.527	0	2.2635	0.969595	0.980977
PSB2_HUMAN Proteasome subunit beta type-2	P49721	23 kDa	1	0	0.5	2	2	2		4.1232	0	2.0616	4.9706	7.2968	6.1337	2.97521	0.227515
CT027_HUMAN Isoform 2 of UPF0687 protein C20orf27	Q9GZN8-2	22 kDa	3	3	3	0	1	0.5		8.2463	5.4458	6.84605	0	2.4323	1.21615	0.177643	0.0935445
MOV10_HUMAN Putative helicase MOV-10	Q9HCE1	114 kDa	1	1	1	4	2	3		1.2298	1.2808	1.2553	4.6856	3.2807	3.98315	3.17307	0.0604417
PSA5_HUMAN Proteasome subunit alpha type-5	P28066	26 kDa	1	2	1.5	1	3	2		2.0616	3.6305	2.84605	1.6569	6.102	3.87945	1.3631	0.703872
COR1A_HUMAN Coronin-1A	P31146	51 kDa	2	1	1.5	2	2	2		1.3602	0.60919	0.984695	1.75572	2.31217	2.03395	2.06556	0.153872
ADT2_HUMAN ADP/ATP translocase 2	P05141	33 kDa	2	1	1.5	2	2	2		4.0722	1.2808	2.6765	2.3428	3.2807	2.81175	1.05053	0.935183
GLO2_HUMAN Hydroxyacylglutathione hydrolase, mitochondrial	Q16775	34 kDa	1	2	1.5	2	2	2		1.2161	1.9119	1.564	1.9382	2.4749	2.20655	1.41084	0.281141
TPP1_HUMAN Isoform 2 of Tripeptidyl-peptidase 1	O14773-2	34 kDa	0	1	0.5	3	1	2		0	1.2184	0.6092	2.36294	0.67177	1.51736	2.49073	0.475416
ALDOC_HUMAN Fructose-bisphosphate aldolase C	P09972	39 kDa	2	1	1.5	2	2	2		2.0403	1.2184	1.62935	2.9216	4.0306	3.4761	2.13343	0.11589
SEPT2_HUMAN Isoform 2 of Septin-2	Q15019-2	45 kDa	1	2	1.5	1	3	2		0.6801	1.2184	0.94925	0.58432	2.581	1.58266	1.66727	0.602521
B4DNW0_HUMAN Aminoacylase-1	B4DNW0	56 kDa	1	1	1	3	2	2.5		0.6801	0.60919	0.644645	1.753	1.3435	1.54825	2.40171	0.0490271
MYG1_HUMAN UPF0160 protein MYG1, mitochondrial	Q9HB07	42 kDa	2	1	1.5	2	2	2		2.4323	0.95595	1.69413	1.9382	2.4749	2.20655	1.30247	0.581105
IVD_HUMAN Isovaleryl-CoA dehydrogenase, mitochondrial	P26440	46 kDa	2	3	2.5	0	1	0.5		1.3602	2.17435	1.76728	0	1.3435	0.67175	0.380105	0.297811
PPCE_HUMAN Prolyl endopeptidase	P48147	81 kDa	3	2	2.5	2	0	1		2.6033	1.6667	2.135	1.2199	0	0.60995	0.285691	0.185811
B4DVE7_HUMAN Annexin	B4DVE7 (+1)	51 kDa	0	2	1	3	2	2.5		0	1.2184	0.6092	1.753	1.3435	1.54825	2.54145	0.281451
ARF1_HUMAN ADP-ribosylation factor 1	P84077	21 kDa	2	0	1	2	2	2		4.1232	0	2.0616	3.3138	7.2968	5.3053	2.57339	0.375219
RAB7A_HUMAN Ras-related protein Rab-7a	P51149	23 kDa	0	2	1	2	3	2.5		0	3.6305	1.81525	3.3138	7.2968	5.3053	2.92263	0.324613
SCLY_HUMAN Selenocysteine lyase	Q96I15	48 kDa	1	2	1.5	3	1	2		0.6801	1.2184	0.94925	1.753	0.67177	1.21238	1.2772	0.705558
GGH_HUMAN Gamma-glutamyl hydrolase	Q92820	36 kDa	2	3	2.5	1	0	0.5		2.4323	3.8238	3.12805	0.96909	0	0.484545	0.154903	0.0893028
CPNE3_HUMAN Copine-3	O75131	60 kDa	0	2	1	2	2	2		0	1.2184	0.6092	1.78134	2.31217	2.04676	3.35974	0.162981
CPSF7_HUMAN Isoform 3 of Cleavage and polyadenylation specificity factor subunit 7	Q8N684-3	56 kDa	1	1	1	1	3	2		2.0616	1.8153	1.93845	1.6569	6.102	3.87945	2.00132	0.475161
EXOS4_HUMAN Exosome complex component RRP41	Q9NPD3	26 kDa	2	2	2	0	1	0.5		2.4323	2.77125	2.60177	0	2.4749	1.23745	0.475618	0.388717
NUP98_HUMAN Isoform 6 of Nuclear pore complex protein Nup98-Nup96	P52948-6	186 kDa	2	2	2	1	1	1		3.2777	3.6305	3.4541	0.96909	2.4323	1.7007	0.49237	0.145154
POP1_HUMAN Ribonucleases P/MRP protein subunit POP1	Q99575	115 kDa	2	2	2	2	0	1		1.7355	1.81299	1.77425	1.78134	0	0.89067	0.501999	0.426092
IF4A1_HUMAN Eukaryotic initiation factor 4A-I	P60842	46 kDa	2	2	2	1	1	1		1.3602	1.2184	1.2893	0.58432	0.67177	0.628045	0.487121	0.0155006
J3KS22_HUMAN L-xylulose reductase (Fragment)	J3KS22 (+1)	24 kDa	1	3	2	1	1	1		2.0616	5.4458	3.7537	1.6569	2.4323	2.0446	0.544689	0.428649
VIME_HUMAN Vimentin	P08670	54 kDa	2	0	1	2	2	2		1.3602	0	0.6801	2.24122	1.3435	1.79236	2.63544	0.305535
THIC_HUMAN Acetyl-CoA acetyltransferase, cytosolic	Q9BWD1	41 kDa	1	3	2	0	1	0.5		0.6801	2.78355	1.73182	0	0.67177	0.335885	0.193949	0.333491
H14_HUMAN Histone H1.4	P10412	22 kDa	0	2	1	1	3	2		0	2.23675	1.11837	0.96909	3.7124	2.34075	2.09299	0.561155
NT5D1_HUMAN 5'-nucleotidase domain-containing protein 1	Q5TFE4	52 kDa	0	2	1	3	1	2		0	1.2184	0.6092	1.753	0.67177	1.21238	1.99013	0.536095
DYR_HUMAN Dihydrofolate reductase	P00374	21 kDa	0	2	1	1	3	2		0	3.6305	1.81525	1.6569	7.2968	4.47685	2.46624	0.510611
DPYL5_HUMAN Dihydropyrimidinase-related protein 5	Q9BPU6	61 kDa	1	4	2.5	1	0	0.5		0.86775	3.3333	2.10053	0.60994	0	0.30497	0.145188	0.292973
CRKL_HUMAN Crk-like protein	P46109	34 kDa	0	1	0.5	2	3	2.5		0	0.95595	0.477975	2.62599	3.7124	3.1692	6.63046	0.0652854
MECP2_HUMAN Methyl-CpG-binding protein 2	P51608	52 kDa	1	1	1	1	3	2		1.2161	0.83333	1.02472	0.60994	2.3891	1.49952	1.46335	0.653842
TRM1_HUMAN tRNA (guanine(26)-N(2))-dimethyltransferase	Q9NXH9	72 kDa	0	0	0	3	3	3		0	0	0	3.5142	4.9211	4.21765	Exclusive to +UV	0.0267085
TGT_HUMAN Queuine tRNA-ribosyltransferase	Q9BXR0	44 kDa	2	2	2	0	1	0.5		1.3602	1.2184	1.2893	0	0.67177	0.335885	0.260517	0.108877
AIFM1_HUMAN Isoform 3 of Apoptosis-inducing factor 1, mitochondrial	O95831-3	66 kDa	2	2	2	1	0	0.5		1.7355	1.6667	1.7011	0.60994	0	0.30497	0.179278	0.0450804
HORN_HUMAN Hornerin	Q86YZ3	282 kDa	1	0	0.5	2	2	2		2.0361	0	1.01805	1.55341	1.7777	1.66555	1.63602	0.591889
ARPC2_HUMAN Actin-related protein 2/3 complex subunit 2	O15144	34 kDa	2	2	2	1	0	0.5		2.4323	1.9119	2.1721	0.96909	0	0.484545	0.223077	0.0918217
NMT1_HUMAN Glycylpeptide N-tetradecanoyltransferase 1	P30419	57 kDa	0	0	0	3	2	2.5		0	0	0	3.5142	3.2807	3.39745	Exclusive to +UV	0.0011788
RUVB2_HUMAN RuvB-like 2	Q9Y230	51 kDa	1	0	0.5	1	3	2		0.6801	0	0.34005	0.58432	2.0153	1.29981	3.82241	0.34941
RANG_HUMAN Ran-specific GTPase-activating protein	P43487	23 kDa	0	0	0	3	1	2		0	0	0	3.5951	1.2375	2.4163	Exclusive to +UV	0.176892
CAPR1_HUMAN Caprin-1	Q14444	78 kDa	0	0	0	3	1	2		0	0	0	1.80422	0.79637	1.30029	Exclusive to +UV	0.123072
E9PHS0_HUMAN LanC-like protein 1 (Fragment)	E9PHS0 (+1)	22 kDa	1	3	2	0	0	0		1.2161	2.8679	2.042	0	0	0	Exclusive to -UV	0.131966
PGAM1_HUMAN Phosphoglycerate mutase 1	P18669	29 kDa	1	3	2	0	0	0		1.2161	2.8679	2.042	0	0	0	Exclusive to -UV	0.131966
SPSY_HUMAN Spermine synthase	P52788	41 kDa	3	1	2	0	0	0		3.6484	0.95595	2.30218	0	0	0	Exclusive to -UV	0.229376
NUP43_HUMAN Nucleoporin Nup43 OS=Homo sapiens GN=NUP43 PE=1 SV=1	Q8NFH3	42 kDa	2	4	3	1	2	1.5		1.8962	2.78355	2.33988	0.96909	1.90927	1.43918	0.615067	0.298154
CHIP_HUMAN E3 ubiquitin-protein ligase CHIP OS=Homo sapiens GN=STUB1 PE=1 SV=2	Q9UNE7	35 kDa	1	3	2	2	1	1.5		1.2161	3.8238	2.51995	1.9382	1.2375	1.58785	0.630112	0.561303
TTC38_HUMAN Tetratricopeptide repeat protein 38 OS=Homo sapiens GN=TTC38 PE=1 SV=1	Q5R3I4	53 kDa	3	1	2	0	2	1		2.0403	0.60919	1.32474	0	1.3435	0.67175	0.507079	0.574299
ACOT1_HUMAN Acyl-coenzyme A thioesterase 1 OS=Homo sapiens GN=ACOT1 PE=1 SV=1	Q86TX2	46 kDa	1	3	2	1	1	1		0.6801	1.8276	1.25385	0.58432	0.67177	0.628045	0.500893	0.390389
PSMD1_HUMAN Isoform 2 of 26S proteasome non-ATPase regulatory subunit 1 OS=Homo sapiens GN=PSMD1	Q99460-2	102 kDa	1	3	2	0	2	1		1.2298	2.939	2.0844	0	2.52924	1.26462	0.606707	0.644955
IDH3A_HUMAN Isocitrate dehydrogenase [NAD] subunit alpha, mitochondrial OS=Homo sapiens GN=IDH3A PE=1 SV=1	P50213	40 kDa	2	2	2	0	2	1		2.4323	1.9119	2.1721	0	2.4749	1.23745	0.569702	0.536799
F8VXU5_HUMAN Vacuolar protein sorting-associated protein 29 OS=Homo sapiens GN=VPS29 PE=2 SV=1	F8VXU5 (+1)	24 kDa	1	3	2	1	1	1		2.0616	5.4458	3.7537	1.6569	2.4323	2.0446	0.544689	0.428649
DECR_HUMAN 2,4-dienoyl-CoA reductase, mitochondrial OS=Homo sapiens GN=DECR1 PE=1 SV=1	Q16698	36 kDa	2	2	2	1	1	1		2.4323	1.9119	2.1721	0.96909	1.2375	1.1033	0.507939	0.067523
ES1_HUMAN ES1 protein homolog, mitochondrial OS=Homo sapiens GN=C21orf33 PE=1 SV=3	P30042 (+1)	28 kDa	2	2	2	2	0	1		6.1848	3.6305	4.90765	3.3138	0	1.6569	0.337616	0.260433
BGAL_HUMAN Beta-galactosidase OS=Homo sapiens GN=GLB1 PE=1 SV=2	P16278	76 kDa	1	3	2	2	1	1.5		0.86775	2.5	1.68388	1.2199	0.79637	1.00814	0.598699	0.50696
PPIL4_HUMAN Peptidyl-prolyl cis-trans isomerase-like 4 OS=Homo sapiens GN=PPIL4 PE=1 SV=1	Q8WUA2	57 kDa	2	2	2	1	2	1.5		1.3602	1.2184	1.2893	0.60994	1.3435	0.97672	0.757558	0.49079
MINP1_HUMAN Multiple inositol polyphosphate phosphatase 1 OS=Homo sapiens GN=MINPP1 PE=1 SV=1	Q9UNW1	55 kDa	2	2	2	2	1	1.5		1.3602	1.2184	1.2893	1.1686	0.67177	0.920185	0.713709	0.289269
Q5SRQ6_HUMAN Casein kinase 2, beta polypeptide, isoform CRA_d OS=Homo sapiens GN=CSNK2B PE=2 SV=2	Q5SRQ6	27 kDa	3	1	2	2	1	1.5		6.1848	1.8153	4.00005	3.3138	2.4323	2.87305	0.718254	0.663318
PSB6_HUMAN Proteasome subunit beta type-6 OS=Homo sapiens GN=PSMB6 PE=1 SV=4	P28072	25 kDa	2	2	2	1	2	1.5		4.1232	3.6305	3.87685	1.6569	4.8645	3.2607	0.841069	0.740677
RM46_HUMAN 39S ribosomal protein L46, mitochondrial OS=Homo sapiens GN=MRPL46 PE=1 SV=1	Q9H2W6	32 kDa	2	2	2	2	1	1.5		2.4323	2.77125	2.60177	1.9382	1.2375	1.58785	0.610295	0.121138
GNPI1_HUMAN Glucosamine-6-phosphate isomerase 1 OS=Homo sapiens GN=GNPDA1 PE=1 SV=1	P46926	33 kDa	1	3	2	2	1	1.5		1.2161	2.8679	2.042	3.5142	1.6404	2.5773	1.26214	0.709963
SETD7_HUMAN Histone-lysine N-methyltransferase SETD7 OS=Homo sapiens GN=SETD7 PE=1 SV=1	Q8WTS6	41 kDa	2	3	2.5	2	1	1.5		1.3602	1.8276	1.5939	1.1686	0.67177	0.920185	0.577317	0.186903
ECI1_HUMAN Enoyl-CoA delta isomerase 1, mitochondrial OS=Homo sapiens GN=ECI1 PE=1 SV=1	P42126 (+1)	33 kDa	2	2	2	1	2	1.5		2.4323	2.8679	2.6501	0.96909	2.4749	1.72199	0.649785	0.358014
B1AK87_HUMAN Capping protein (Actin filament) muscle Z-line, beta, isoform CRA_a OS=Homo sapiens GN=CAPZB PE=2 SV=1	B1AK87 (+2)	29 kDa	2	2	2	2	1	1.5		2.4323	1.9119	2.1721	2.9073	1.2375	2.0724	0.9541	0.919645
The following proteins are excluded from further analysis because either not present in both the replicates or with averaged unique peptide counts less than 2
			UNIQUE PEPTIDE COUNTS			UNIQUE PEPTIDE COUNTS				NORMALIZED TOTAL SPECTRA			NORMALIZED TOTAL SPECTRA			FOLD ENRICHMENT	p-Value
	Accession		NO LIGHT			LIGHT				NO LIGHT			LIGHT			(+UV/-UV)
	Number	Mol. Wt.	1st set	2nd set	avg (No light)	1st set	2nd set	Avg (Light)		1st set	2nd set	Avg (No light)	1 st set	2nd set	Avg (Light)
DESP_HUMAN Desmoplakin OS=Homo sapiens GN=DSP PE=1 SV=3	P15924	332 kDa	0	34	17	0	0	0		0	44.9047	22.4523	0	0	0	0	0.42265
K2C1B_HUMAN Keratin, type II cytoskeletal 1b OS=Homo sapiens GN=KRT77 PE=2 SV=3	Q7Z794	62 kDa	0	13	6.5	0	3	1.5		6.1082	32.3001	19.2041	0	10.2541	5.12705	0.266976	0.422286
KRT85_HUMAN Keratin, type II cuticular Hb5 OS=Homo sapiens GN=KRT85 PE=1 SV=1	P78386	56 kDa	0	10	5	5	0	2.5		0	14.089	7.0445	6.7836	0	3.3918	0.481482	0.686323
K1H1_HUMAN Keratin, type I cuticular Ha1 OS=Homo sapiens GN=KRT31 PE=2 SV=3	Q15323	47 kDa	0	8	4	5	0	2.5		0	12.808	6.404	6.7836	0	3.3918	0.529638	0.718011
IMA3_HUMAN Importin subunit alpha-3 OS=Homo sapiens GN=KPNA4 PE=1 SV=1	O00629	58 kDa	1	2	1.5	1	1	1		2.0403	3.046	2.54315	1.753	2.0153	1.88415	0.740873	0.332399
F5GWP8_HUMAN Junction plakoglobin OS=Homo sapiens GN=JUP PE=2 SV=1	F5GWP8	66 kDa	0	9	4.5	1	1	1		0	23.054	11.527	3.5059	5.333	4.41945	0.3834	0.601384
B3KVN2_HUMAN Farnesyltransferase, CAAX box, alpha, isoform CRA_c OS=Homo sapiens GN=FNTA PE=2 SV=1	B3KVN2 (+2)	27 kDa	1	1	1	2	1	1.5		0.6801	0.60919	0.644645	1.753	2.0153	1.88415	2.92277	0.0118014
PLAK_HUMAN Junction plakoglobin OS=Homo sapiens GN=JUP PE=1 SV=3	P14923	82 kDa	0	7	3.5	1	0	0.5		0	16.65	8.325	1.1686	0	0.5843	0.0701862	0.451569
THTM_HUMAN 3-mercaptopyruvate sulfurtransferase OS=Homo sapiens GN=MPST PE=1 SV=3	P25325	33 kDa	1	2	1.5	1	2	1.5		1.2161	2.8679	2.042	0.96909	2.4749	1.72199	0.843288	0.801555
PPM1A_HUMAN Isoform 3 of Protein phosphatase 1A OS=Homo sapiens GN=PPM1A	P35813-3	51 kDa	1	2	1.5	2	1	1.5		0.6801	1.8276	1.25385	1.1686	0.67177	0.920185	0.733888	0.646936
TWF1_HUMAN Twinfilin-1 OS=Homo sapiens GN=TWF1 PE=1 SV=3	Q12792	40 kDa	1	2	1.5	2	1	1.5		1.2161	1.9119	1.564	2.3428	1.6404	1.9916	1.2734	0.478224
DHRS2_HUMAN Dehydrogenase/reductase SDR family member 2, mitochondrial OS=Homo sapiens GN=DHRS2 PE=1 SV=4	Q13268	30 kDa	1	2	1.5	1	2	1.5		2.0616	3.6305	2.84605	1.6569	4.8645	3.2607	1.14569	0.837946
LGUL_HUMAN Lactoylglutathione lyase OS=Homo sapiens GN=GLO1 PE=1 SV=4	Q04760 (+1)	21 kDa	2	1	1.5	1	2	1.5		4.1232	1.8153	2.96925	1.6569	4.8645	3.2607	1.09816	0.896257
AATC_HUMAN Aspartate aminotransferase, cytoplasmic OS=Homo sapiens GN=GOT1 PE=1 SV=3	P17174	46 kDa	2	1	1.5	2	1	1.5		1.3602	0.60919	0.984695	1.1686	0.67177	0.920185	0.934487	0.899202
TBB5_HUMAN Tubulin beta chain OS=Homo sapiens GN=TUBB PE=1 SV=2	P07437	50 kDa	1	1	1	1	2	1.5		5.4408	7.9195	6.68015	6.4275	5.3741	5.9008	0.883333	0.621255
PIR_HUMAN Pirin OS=Homo sapiens GN=PIR PE=1 SV=1	O00625	32 kDa	1	2	1.5	2	1	1.5		1.2161	1.9119	1.564	1.9382	1.2375	1.58785	1.01525	0.965863
NUD16_HUMAN U8 snoRNA-decapping enzyme OS=Homo sapiens GN=NUDT16 PE=1 SV=2	Q96DE0	21 kDa	2	1	1.5	0	3	1.5		4.1232	1.8153	2.96925	0	7.2968	3.6484	1.22873	0.875477
E9PKG6_HUMAN Nefastin-1 OS=Homo sapiens GN=NUCB2 PE=2 SV=1	E9PKG6 (+2)	40 kDa	0	3	1.5	2	1	1.5		0	1.8276	0.9138	1.1686	0.67177	0.920185	1.00699	0.995232
DPYL4_HUMAN Dihydropyrimidinase-related protein 4 OS=Homo sapiens GN=DPYSL4 PE=1 SV=2	O14531	62 kDa	1	2	1.5	3	0	1.5		0.86775	1.6667	1.26723	1.8298	0	0.9149	0.721971	0.757872
SPTN1_HUMAN Spectrin alpha chain, non-erythrocytic 1 OS=Homo sapiens GN=SPTAN1 PE=1 SV=3	Q13813 (+1)	285 kDa	1	1	1	0	4	2		1.2298	0.97966	1.10473	0	3.46287	1.73144	1.56729	0.752655
K2C78_HUMAN Keratin, type II cytoskeletal 78 OS=Homo sapiens GN=KRT78 PE=2 SV=2	Q8N1N4	57 kDa	0	4	2	1	1	1		0	10.3227	5.16135	3.3138	6.5615	4.93765	0.956659	0.970778
KRT82_HUMAN Keratin, type II cuticular Hb2 OS=Homo sapiens GN=KRT82 PE=1 SV=3	Q9NSB4	57 kDa	0	3	1.5	2	0	1		0	7.6848	3.8424	5.8145	0	2.90725	0.756623	0.864037
COF1_HUMAN Cofilin-1 OS=Homo sapiens GN=CFL1 PE=1 SV=3	P23528	19 kDa	1	1	1	2	1	1.5		2.0616	1.8153	1.93845	3.3138	2.4323	2.87305	1.48214	0.177873
G3V5Z7_HUMAN Proteasome subunit alpha type OS=Homo sapiens GN=PSMA6 PE=2 SV=1	G3V5Z7 (+1)	28 kDa	0	3	1.5	1	1	1		0	4.58645	2.29323	1.6569	1.2375	1.4472	0.631076	0.748561
DBLOH_HUMAN Isoform 2 of Diablo homolog, mitochondrial OS=Homo sapiens GN=DIABLO	Q9NR28-2	21 kDa	1	1	1	1	2	1.5		2.0616	1.8153	1.93845	1.6569	4.8645	3.2607	1.68212	0.497466
RAB14_HUMAN Ras-related protein Rab-14 OS=Homo sapiens GN=RAB14 PE=1 SV=4	P61106	24 kDa	1	1	1	2	1	1.5		2.0616	1.8153	1.93845	3.3138	2.4323	2.87305	1.48214	0.177873
PSF1_HUMAN DNA replication complex GINS protein PSF1 OS=Homo sapiens GN=GINS1 PE=1 SV=1	Q14691	23 kDa	2	1	1.5	1	1	1		4.1232	1.8153	2.96925	1.6569	2.4323	2.0446	0.688591	0.526834
AL7A1_HUMAN Alpha-aminoadipic semialdehyde dehydrogenase OS=Homo sapiens GN=ALDH7A1 PE=1 SV=5	P49419 (+1)	58 kDa	1	2	1.5	1	1	1		0.6801	1.2184	0.94925	0.58432	0.67177	0.628045	0.661622	0.359992
SET_HUMAN Isoform 2 of Protein SET OS=Homo sapiens GN=SET	Q01105-2	32 kDa	1	1	1	1	2	1.5		2.0616	1.8153	1.93845	1.6569	4.8645	3.2607	1.68212	0.497466
EF1B_HUMAN Elongation factor 1-beta OS=Homo sapiens GN=EEF1B2 PE=1 SV=3	P24534	25 kDa	1	2	1.5	1	1	1		1.2161	1.9119	1.564	0.96909	1.2375	1.1033	0.705432	0.342078
GTPB3_HUMAN Isoform 4 of tRNA modification GTPase GTPBP3, mitochondrial OS=Homo sapiens GN=GTPBP3	Q969Y2-4	54 kDa	2	0	1	1	2	1.5		1.3602	0	0.6801	0.58432	1.3435	0.96391	1.41731	0.750486
HDDC2_HUMAN HD domain-containing protein 2 OS=Homo sapiens GN=HDDC2 PE=1 SV=1	Q7Z4H3 (+1)	23 kDa	0	2	1	1	2	1.5		0	3.6305	1.81525	1.6569	4.8645	3.2607	1.79628	0.611235
NPS3A_HUMAN Protein NipSnap homolog 3A OS=Homo sapiens GN=NIPSNAP3A PE=1 SV=2	Q9UFN0	28 kDa	2	1	1.5	2	0	1		4.1232	1.8153	2.96925	3.3138	0	1.6569	0.55802	0.582403
E7ESP9_HUMAN Neurofilament medium polypeptide OS=Homo sapiens GN=NEFM PE=2 SV=1	E7ESP9 (+1)	98 kDa	2	1	1.5	2	0	1		1.3602	0.60919	0.984695	1.19426	0	0.59713	0.606411	0.63786
NUP37_HUMAN Nucleoporin Nup37 OS=Homo sapiens GN=NUP37 PE=1 SV=1	Q8NFH4	37 kDa	1	2	1.5	2	0	1		1.2161	1.9119	1.564	1.9382	0	0.9691	0.619629	0.621802
ANXA1_HUMAN Annexin A1 OS=Homo sapiens GN=ANXA1 PE=1 SV=2	P04083	39 kDa	0	2	1	1	2	1.5		0	1.9119	0.95595	0.96909	2.4749	1.72199	1.80134	0.593325
HEM6_HUMAN Coproporphyrinogen-III oxidase, mitochondrial OS=Homo sapiens GN=CPOX PE=1 SV=3	P36551	50 kDa	2	1	1.5	2	0	1		2.4323	0.95595	1.69413	1.9382	0	0.9691	0.572036	0.612113
NONO_HUMAN Non-POU domain-containing octamer-binding protein OS=Homo sapiens GN=NONO PE=1 SV=4	Q15233	54 kDa	0	2	1	2	1	1.5		0	1.2184	0.6092	1.1686	0.67177	0.920185	1.51048	0.682995
P20D2_HUMAN Peptidase M20 domain-containing protein 2 OS=Homo sapiens GN=PM20D2 PE=1 SV=2	Q8IYS1	48 kDa	0	2	1	2	1	1.5		0	1.2184	0.6092	1.1686	0.67177	0.920185	1.51048	0.682995
MEP50_HUMAN Methylosome protein 50 OS=Homo sapiens GN=WDR77 PE=1 SV=1	Q9BQA1	37 kDa	0	1	0.5	2	1	1.5		0	0.95595	0.477975	2.9073	1.2375	2.0724	4.33579	0.239302
C1QBP_HUMAN Complement component 1 Q subcomponent-binding protein, mitochondrial OS=Homo sapiens GN=C1QBP PE=1 SV=1	Q07021	31 kDa	1	1	1	0	3	1.5		1.2161	0.95595	1.08603	0	3.7124	1.8562	1.70917	0.719108
GSH1_HUMAN Glutamate--cysteine ligase catalytic subunit OS=Homo sapiens GN=GCLC PE=1 SV=2	P48506	73 kDa	2	0	1	3	0	1.5		1.7355	0	0.86775	1.8298	0	0.9149	1.05434	0.973569
KRT86_HUMAN Keratin, type II cuticular Hb6 OS=Homo sapiens GN=KRT86 PE=1 SV=1	O43790	53 kDa	0	1	0.5	3	0	1.5		0	12.808	6.404	7.7527	0	3.87635	0.605301	0.767767
FILA_HUMAN Filaggrin OS=Homo sapiens GN=FLG PE=1 SV=3	P20930	435 kDa	0	1	0.5	4	0	2		0	0.97966	0.48983	4.6856	0	2.3428	4.78288	0.519814
ARGI2_HUMAN Arginase-2, mitochondrial OS=Homo sapiens GN=ARG2 PE=1 SV=1	P78540	39 kDa	1	2	1.5	1	0	0.5		1.2161	1.9119	1.564	0.96909	0	0.484545	0.309811	0.212068
RFA2_HUMAN Isoform 3 of Replication protein A 32 kDa subunit OS=Homo sapiens GN=RPA2	P15927-3	39 kDa	1	1	1	0	2	1		2.0616	1.8153	1.93845	0	4.8645	2.43225	1.25474	0.858077
B1AKJ5_HUMAN Nardilysin OS=Homo sapiens GN=NRD1 PE=2 SV=1	B1AKJ5 (+1)	139 kDa	1	0	0.5	1	2	1.5		1.2298	0	0.6149	1.0128	1.7777	1.39525	2.26907	0.393908
THTR_HUMAN Thiosulfate sulfurtransferase OS=Homo sapiens GN=TST PE=1 SV=4	Q16762	33 kDa	1	0	0.5	1	2	1.5		1.2161	0	0.60805	0.96909	2.4749	1.72199	2.832	0.368751
C9JIF9_HUMAN Acylamino-acid-releasing enzyme OS=Homo sapiens GN=APEH PE=2 SV=1	C9JIF9 (+1)	82 kDa	0	1	0.5	1	2	1.5		0	0.83333	0.416665	0.60994	1.5927	1.10132	2.64318	0.399259
B4E2S7_HUMAN Lysosome-associated membrane glycoprotein 2 OS=Homo sapiens GN=LAMP2 PE=2 SV=1	B4E2S7 (+3)	40 kDa	1	1	1	2	0	1		1.2298	0.97966	1.10473	2.0256	0	1.0128	0.916785	0.93643
ARC1B_HUMAN Actin-related protein 2/3 complex subunit 1B OS=Homo sapiens GN=ARPC1B PE=1 SV=3	O15143	41 kDa	1	0	0.5	2	1	1.5		2.0361	0	1.01805	2.3428	1.6404	1.9916	1.95629	0.461406
B1AJY5_HUMAN 26S proteasome non-ATPase regulatory subunit 10 OS=Homo sapiens GN=PSMD10 PE=2 SV=1	B1AJY5 (+2)	20 kDa	1	0	0.5	1	2	1.5		2.0616	0	1.0308	1.6569	4.8645	3.2607	3.16327	0.362675
G8JLB3_HUMAN tRNA pseudouridine synthase (Fragment) OS=Homo sapiens GN=PUS1 PE=2 SV=1	G8JLB3 (+2)	43 kDa	1	1	1	0	2	1		0.6801	0.60919	0.644645	0	1.3435	0.67175	1.04205	0.97152
TMLH_HUMAN Isoform 8 of Trimethyllysine dioxygenase, mitochondrial OS=Homo sapiens GN=TMLHE	Q9NVH6-8	51 kDa	1	2	1.5	0	1	0.5		0.6801	1.2184	0.94925	0	0.67177	0.335885	0.353843	0.290202
QOR_HUMAN Quinone oxidoreductase OS=Homo sapiens GN=CRYZ PE=1 SV=1	Q08257	35 kDa	0	2	1	1	1	1		0	1.9119	0.95595	0.96909	1.2375	1.1033	1.15413	0.892692
PSPC1_HUMAN Isoform 2 of Paraspeckle component 1 OS=Homo sapiens GN=PSPC1	Q8WXF1-2	46 kDa	1	1	1	2	0	1		0.6801	0.60919	0.644645	1.1686	0	0.5843	0.90639	0.927299
SEP11_HUMAN Septin-11 OS=Homo sapiens GN=SEPT11 PE=1 SV=3	Q9NVA2	49 kDa	2	1	1.5	0	1	0.5		1.3602	0.60919	0.984695	0	0.67177	0.335885	0.341106	0.326708
FLNB_HUMAN Filamin-B OS=Homo sapiens GN=FLNB PE=1 SV=2	O75369 (+3)	278 kDa	0	1	0.5	2	1	1.5		0	1.9593	0.97965	2.0256	0.88884	1.45722	1.48749	0.714271
D6REM6_HUMAN Matrin-3 OS=Homo sapiens GN=MATR3 PE=2 SV=1	D6REM6 (+1)	88 kDa	2	1	1.5	1	0	0.5		2.4323	0.95595	1.69413	0.60994	0	0.30497	0.180016	0.224114
F5H2U2_HUMAN Serine/threonine-protein kinase PRP4 homolog OS=Homo sapiens GN=PRPF4B PE=2 SV=1	F5H2U2 (+1)	115 kDa	0	1	0.5	0	3	1.5		0	1.8153	0.90765	0	6.102	3.051	3.36143	0.570114
CAZA1_HUMAN F-actin-capping protein subunit alpha-1 OS=Homo sapiens GN=CAPZA1 PE=1 SV=3	P52907	33 kDa	0	1	0.5	1	2	1.5		0	1.9119	0.95595	1.9382	3.7124	2.8253	2.95549	0.288146
MEMO1_HUMAN Protein MEMO1 OS=Homo sapiens GN=MEMO1 PE=1 SV=1	Q9Y316 (+2)	34 kDa	1	2	1.5	1	0	0.5		1.2161	1.9119	1.564	0.96909	0	0.484545	0.309811	0.212068
ECHB_HUMAN Trifunctional enzyme subunit beta, mitochondrial OS=Homo sapiens GN=HADHB PE=1 SV=3	P55084	51 kDa	1	0	0.5	1	2	1.5		0.6801	0	0.34005	0.58432	1.3435	0.96391	2.83461	0.34553
H0YDX7_HUMAN HBS1-like protein (Fragment) OS=Homo sapiens GN=HBS1L PE=2 SV=1	H0YDX7 (+2)	61 kDa	1	0	0.5	3	0	1.5		2.0361	0	1.01805	3.5142	0	1.7571	1.72595	0.750779
RCC2_HUMAN Protein RCC2 OS=Homo sapiens GN=RCC2 PE=1 SV=2	Q9P258	56 kDa	0	0	0	3	0	1.5		0	0	0	4.6856	0	2.3428	#DIV/0!	0.42265
H0YL69_HUMAN Proteasome subunit alpha type (Fragment) OS=Homo sapiens GN=PSMA4 PE=2 SV=1	H0YL69 (+1)	26 kDa	0	2	1	1	0	0.5		0	1.9119	0.95595	0.96909	0	0.484545	0.506873	0.703012
DCAF7_HUMAN DDB1- and CUL4-associated factor 7 OS=Homo sapiens GN=DCAF7 PE=1 SV=1	P61962	39 kDa	1	0	0.5	0	2	1		1.2161	0	0.60805	0	2.4749	1.23745	2.03511	0.692817
NLTP_HUMAN Non-specific lipid-transfer protein OS=Homo sapiens GN=SCP2 PE=1 SV=2	P22307 (+2)	59 kDa	0	2	1	1	0	0.5		0	1.2184	0.6092	0.58432	0	0.29216	0.47958	0.685075
K1H2_HUMAN Keratin, type I cuticular Ha2 OS=Homo sapiens GN=KRT32 PE=1 SV=3	Q14532	50 kDa	0	1	0.5	2	0	1		0	5.1232	2.5616	3.8763	0	1.93815	0.756617	0.864033
PAPS1_HUMAN Bifunctional 3'-phosphoadenosine 5'-phosphosulfate synthase 1 OS=Homo sapiens GN=PAPSS1 PE=1 SV=2	O43252	71 kDa	1	2	1.5	0	0	0		0.86775	1.6667	1.26723	0	0	0	0	0.0866523
TPIS_HUMAN Isoform 2 of Triosephosphate isomerase OS=Homo sapiens GN=TPI1	P60174-1	27 kDa	1	0	0.5	0	2	1		2.0616	0	1.0308	0	2.4749	1.23745	1.20048	0.909641
THIO_HUMAN Thioredoxin OS=Homo sapiens GN=TXN PE=1 SV=3	P10599 (+1)	12 kDa	0	2	1	1	0	0.5		0	2.5616	1.2808	1.6569	0	0.82845	0.646822	0.794771
BAG3_HUMAN BAG family molecular chaperone regulator 3 OS=Homo sapiens GN=BAG3 PE=1 SV=3	O95817	62 kDa	1	2	1.5	0	0	0		0.86775	1.6667	1.26723	0	0	0	0	0.0866523
K1C15_HUMAN Keratin, type I cytoskeletal 15 OS=Homo sapiens GN=KRT15 PE=1 SV=3	P19012	49 kDa	2	1	1.5	0	0	0		4.8645	12.808	8.83625	0	0	0	0	0.156072
DHB4_HUMAN Peroxisomal multifunctional enzyme type 2 OS=Homo sapiens GN=HSD17B4 PE=1 SV=3	P51659	80 kDa	0	2	1	0	1	0.5		0	1.9119	0.95595	0	1.2375	0.61875	0.647262	0.795055
IDH3B_HUMAN Isocitrate dehydrogenase [NAD] subunit beta, mitochondrial OS=Homo sapiens GN=IDH3B PE=1 SV=2	O43837	42 kDa	1	0	0.5	2	0	1		1.2161	0	0.60805	1.9382	0	0.9691	1.59378	0.782204
WDR26_HUMAN WD repeat-containing protein 26 OS=Homo sapiens GN=WDR26 PE=1 SV=3	Q9H7D7 (+1)	72 kDa	0	1	0.5	2	0	1		0	0.83333	0.416665	1.2199	0	0.60995	1.46389	0.818065
BDH2_HUMAN 3-hydroxybutyrate dehydrogenase type 2 OS=Homo sapiens GN=BDH2 PE=1 SV=2	Q9BUT1	27 kDa	1	2	1.5	0	0	0		2.0616	3.6305	2.84605	0	0	0	0	0.0682812
KT33B_HUMAN Keratin, type I cuticular Ha3-II OS=Homo sapiens GN=KRT33B PE=2 SV=3	Q14525	46 kDa	0	2	1	1	0	0.5		0	11.527	5.7635	3.8763	0	1.93815	0.33628	0.593558
KI67_HUMAN Antigen KI-67 OS=Homo sapiens GN=MKI67 PE=1 SV=2	P46013	359 kDa	0	0	0	3	0	1.5		0	0	0	2.2327	0	1.11635	#DIV/0!	0.42265
CLYBL_HUMAN Citrate lyase subunit beta-like protein, mitochondrial OS=Homo sapiens GN=CLYBL PE=2 SV=2	Q8N0X4	37 kDa	0	2	1	1	0	0.5		0	1.9119	0.95595	0.96909	0	0.484545	0.506873	0.703012
APEX1_HUMAN DNA-(apurinic or apyrimidinic site) lyase OS=Homo sapiens GN=APEX1 PE=1 SV=2	P27695	36 kDa	0	1	0.5	0	2	1		0	0.95595	0.477975	0	2.4749	1.23745	2.58894	0.624752
AL9A1_HUMAN 4-trimethylaminobutyraldehyde dehydrogenase OS=Homo sapiens GN=ALDH9A1 PE=1 SV=3	P49189	54 kDa	2	1	1.5	0	0	0		1.3602	0.60919	0.984695	0	0	0	0	0.119836
EMAL4_HUMAN Echinoderm microtubule-associated protein-like 4 OS=Homo sapiens GN=EML4 PE=1 SV=3	Q9HC35 (+1)	109 kDa	0	0	0	2	1	1.5		0	0	0	2.3428	1.6404	1.9916	#DIV/0!	0.0297169
DSC1_HUMAN Isoform 1B of Desmocollin-1 OS=Homo sapiens GN=DSC1	Q08554-2	94 kDa	0	1	0.5	2	0	1		0	1.2808	0.6404	1.1686	0	0.5843	0.912399	0.954289
RBP56_HUMAN TATA-binding protein-associated factor 2N OS=Homo sapiens GN=TAF15 PE=1 SV=1	Q92804 (+1)	62 kDa	0	0	0	1	2	1.5		0	0	0	0.96909	2.4749	1.72199	#DIV/0!	0.149463
GCDH_HUMAN Glutaryl-CoA dehydrogenase, mitochondrial OS=Homo sapiens GN=GCDH PE=1 SV=1	Q92947	48 kDa	1	2	1.5	0	0	0		0.6801	1.2184	0.94925	0	0	0	0	0.0718391
FUCO2_HUMAN Plasma alpha-L-fucosidase OS=Homo sapiens GN=FUCA2 PE=1 SV=2	Q9BTY2	54 kDa	1	0	0.5	2	0	1		0.6801	0	0.34005	1.1686	0	0.5843	1.71828	0.752478
PKP1_HUMAN Plakophilin-1 OS=Homo sapiens GN=PKP1 PE=1 SV=2	Q13835	83 kDa	0	3	1.5	0	0	0		0	3.8424	1.9212	0	0	0	0	0.42265
SF3B1_HUMAN Splicing factor 3B subunit 1 OS=Homo sapiens GN=SF3B1 PE=1 SV=3	O75533	146 kDa	0	0	0	3	0	1.5		0	0	0	1.8298	0	0.9149	#DIV/0!	0.42265
VATB2_HUMAN V-type proton ATPase subunit B, brain isoform OS=Homo sapiens GN=ATP6V1B2 PE=1 SV=3	P21281	57 kDa	0	2	1	0	0	0		0	1.2184	0.6092	0	0	0	0	0.42265
K1C24_HUMAN Keratin, type I cytoskeletal 24 OS=Homo sapiens GN=KRT24 PE=1 SV=1	Q2M2I5	55 kDa	0	0	0	0	2	1		0	0	0	0	2.6871	1.34355	#DIV/0!	0.42265
ROAA_HUMAN Isoform 3 of Heterogeneous nuclear ribonucleoprotein A/B OS=Homo sapiens GN=HNRNPAB	Q99729-3	31 kDa	0	0	0	0	2	1		0	0	0	0	2.0153	1.00765	#DIV/0!	0.42265
KRT34_HUMAN Keratin, type I cuticular Ha4 OS=Homo sapiens GN=KRT34 PE=2 SV=2	O76011	49 kDa	0	2	1	0	0	0		0	5.1232	2.5616	0	0	0	0	0.42265
DKC1_HUMAN H/ACA ribonucleoprotein complex subunit 4 OS=Homo sapiens GN=DKC1 PE=1 SV=3	O60832	58 kDa	0	0	0	2	0	1		0	0	0	2.3428	0	1.1714	#DIV/0!	0.42265
AL4A1_HUMAN Delta-1-pyrroline-5-carboxylate dehydrogenase, mitochondrial OS=Homo sapiens GN=ALDH4A1 PE=1 SV=3	P30038	62 kDa	0	0	0	2	0	1		0	0	0	1.2199	0	0.60995	#DIV/0!	0.42265
SNUT1_HUMAN U4/U6.U5 tri-snRNP-associated protein 1 OS=Homo sapiens GN=SART1 PE=1 SV=1	O43290	90 kDa	0	0	0	2	0	1		0	0	0	3.3138	0	1.6569	#DIV/0!	0.42265
HP1B3_HUMAN Isoform 2 of Heterochromatin protein 1-binding protein 3 OS=Homo sapiens GN=HP1BP3	Q5SSJ5-2 (+1)	57 kDa	0	0	0	2	0	1		0	0	0	1.2199	0	0.60995	#DIV/0!	0.42265
SSRP1_HUMAN FACT complex subunit SSRP1 OS=Homo sapiens GN=SSRP1 PE=1 SV=1	Q08945	81 kDa	0	2	1	0	0	0		0	1.2184	0.6092	0	0	0	0	0.42265
ARC1A_HUMAN Actin-related protein 2/3 complex subunit 1A OS=Homo sapiens GN=ARPC1A PE=1 SV=2	Q92747	42 kDa	0	0	0	2	0	1		0	0	0	2.3428	0	1.1714	#DIV/0!	0.42265
SHOC2_HUMAN Leucine-rich repeat protein SHOC-2 OS=Homo sapiens GN=SHOC2 PE=1 SV=2	Q9UQ13 (+1)	65 kDa	0	0	0	2	0	1		0	0	0	1.2199	0	0.60995	#DIV/0!	0.42265
CBX3_HUMAN Chromobox protein homolog 3 OS=Homo sapiens GN=CBX3 PE=1 SV=4	Q13185	21 kDa	0	0	0	0	2	1		0	0	0	0	4.8645	2.43225	#DIV/0!	0.42265
COR1B_HUMAN Coronin-1B OS=Homo sapiens GN=CORO1B PE=1 SV=1	Q9BR76	54 kDa	0	2	1	0	0	0		0	1.2184	0.6092	0	0	0	0	0.42265
FABD_HUMAN Malonyl-CoA-acyl carrier protein transacylase, mitochondrial OS=Homo sapiens GN=MCAT PE=1 SV=2	Q8IVS2	43 kDa	0	0	0	0	2	1		0	0	0	0	1.3435	0.67175	#DIV/0!	0.42265
